# Supplementary material for: C2-Symmetric S/C/S ligands based on N-heterocyclic carbenes: a new ligand architecture for asymmetric catalysis
Source: Royal Society of Chemistry journal article supplement (doi:10.1039/b910846g), 2009-01-01

# C<sub>2</sub>-Symmetric S/C/S ligands based on N-heterocyclic carbenes: a new ligand architecture for asymmetric catalysis

Javier Iglesias-Sigüenza,<sup>a</sup> Abel Ros,<sup>b</sup> Elena Díez,<sup>a</sup> Antonio Magriz,<sup>b</sup> Arcadio Vázquez,<sup>b</sup>  
Eleuterio Álvarez,<sup>b</sup> Rosario Fernández<sup>\*a</sup> and José M. Lassaletta<sup>\*b</sup>

<sup>a</sup> *Departamento de Química Orgánica, Universidad de Sevilla, Apdo. de Correos 1203, 41071 Sevilla, Spain*

<sup>b</sup> *Instituto de Investigaciones Químicas (CSIC-US), Américo Vespucio 49, 41092 Sevilla, Spain.*

## ELECTRONIC SUPPORTING INFORMATION

**General experimental methods.** Solvents were purified and dried by standard procedures. Flash chromatography was carried out on silica-gel (0.040-0.063 mm or 0.015-0.040 mm). Melting points were recorded in a metal block and are uncorrected.  $[\alpha]_D$  values are given in  $10^{-1}$  deg  $\text{cm}^2 \text{g}^{-1}$ . <sup>1</sup>H NMR spectra were recorded at 300 MHz, 400 MHz or 500 MHz; <sup>13</sup>C NMR spectra were recorded at 75 MHz, 100 MHz or 125 MHz, with the solvent peak used as the internal reference. Coupling constants (*J* values) are given in Hz. (*R*)-2-(*tert*-Butylthio)-3-methylbutan-1-ol (**1b**),<sup>1</sup> (*R*)-2-phenylthio-3-methylbutan-1-ol<sup>2</sup> (**1c**), (*R*)-2-benzylsulfanyl-3-methylbutan-1-ol (**1d**)<sup>2</sup> and (*R*)-(1-bromo-3-methylbutan-2-yl)(cyclohexyl)sulfane (**2a**)<sup>3</sup> were prepared following previously described procedures. The enantiomeric excesses (ee's) were determined by HPLC using Chiralpak AS with *i*-PrOH/hexane mixtures as the eluent.

### (*R*)-1-[2-(Cyclohexylthio)-3-methylbutyl]-1*H*-imidazole (**3a**)

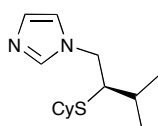

- (a) D. A. Evans, K. R. Campos, J. S. Tedrow, F. E. Michael and M. R. Gagné, *J. Am. Chem. Soc.* 2000, **122**, 7905.  
(b) D. A. Cogan, G. Liu, K. Kim, B. J. Backes and J. A. Ellman, *J. Am. Chem. Soc.* 1998, **120**, 8011.
- M. Marigo, T. C. Wabnitz, D. Fielenbach and K. A. Jørgensen, *Angew. Chem. Int. Ed.* 2005, **44**, 794.
- A. Ros, D. Monge, M. Alcarazo, E. Álvarez, J. M. Lassaletta and R. Fernández, *Organometallics* 2006, **25**, 6039.

1*H*-Imidazole (166 mg, 2.44 mmol) was added to a solution of (*R*)-(1-bromo-3-methylbutan-2-yl)(cyclohexyl)sulfane **2a** (323 mg, 1.22 mmol) in dry toluene (3 mL). The reaction mixture was stirred for 20 h at 80 °C and concentrated. The residue was diluted with CH<sub>2</sub>Cl<sub>2</sub> (20 mL) and washed with saturated NaHCO<sub>3</sub> (2 × 10 mL). The organic layer was dried (Na<sub>2</sub>SO<sub>4</sub>), concentrated, and the resulting residue was purified by flash chromatography (1:15 MeOH-CH<sub>2</sub>Cl<sub>2</sub>) to afford **3a** (224 mg, 79%) as a yellow syrup. [ $\alpha$ ]<sub>D</sub><sup>20</sup> +23.5 (*c* 0.5, CHCl<sub>3</sub>); <sup>1</sup>H NMR (500 MHz, CDCl<sub>3</sub>):  $\delta$  7.53 (1H, s), 7.04 (1H, s), 6.95 (1H, s), 4.11 (1H, dd, *J* = 14.2, 6.3 Hz), 3.96 (1H, dd, *J* = 14.2, 8.5 Hz), 2.69 (1H, ddd, *J* = 8.5, 6.3, 3.4 Hz), 2.09-2.05 (1H, m), 1.87-1.81 (2H, m), 1.71-1.65 (3H, m), 1.56-1.49 (1H, m), 1.24-1.12 (5H, m), 1.03 (3H, d, *J* = 6.8 Hz), 0.93 (3H, d, *J* = 6.8 Hz); <sup>13</sup>C NMR (125 MHz, CDCl<sub>3</sub>):  $\delta$  137.6, 129.2, 119.1, 52.9, 51.5, 44.4, 34.0, 33.8, 30.1, 25.9, 25.8, 25.6, 20.5, 17.5; MS (CI): *m/z* (%): 253 (34) [M<sup>+</sup>], 252 (30), 185 (100), 171 (83), 129 (68), 89 (47), 83 (43), 69 (46); HRMS: *m/z*: calcd for C<sub>14</sub>H<sub>25</sub>N<sub>2</sub>S: 253.1738; found: 253.1750.

**(*R,R*)-1,3-Bis[2-(cyclohexylthio)-3-methylbutyl]-3*H*-imidazol-1-ium bromide (**4a**)**

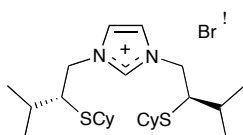

A solution of (*R*)-(1-bromo-3-methylbutan-2-yl)(cyclohexyl)sulfane (**2a**) (244 mg, 0.92 mmol) in dry toluene (2.2 mL) was added dropwise to a solution of **3a** (232 mg, 0.92 mmol) in dry toluene (2 mL) and the reaction mixture was refluxed for 2 d. The reaction mixture was concentrated and the residue was purified by flash chromatography (1:15 MeOH-CH<sub>2</sub>Cl<sub>2</sub>) to give **4a** (370 mg, 78%) as a white foam. [ $\alpha$ ]<sub>D</sub><sup>20</sup> +3.3 (*c* 1.0 in CHCl<sub>3</sub>); <sup>1</sup>H NMR (500 MHz, CDCl<sub>3</sub>):  $\delta$  10.65 (1H, s), 7.54 (2H, s), 4.71 (2H, dd, *J* = 14.0, 5.0 Hz), 4.10 (2H, dd, *J* = 14.0, 9.5 Hz), 3.00 (2H, q, *J* = 4.5 Hz), 2.42-2.35 (2H, m), 2.20-1.96 (2H, m), 1.92-1.85 (2H, m), 1.74-1.59 (8H, m), 1.54-1.50 (2H, m), 1.29-1.13 (8H, m), 1.07 (6H, d, *J* = 7.0 Hz), 0.97 (6H, d, *J* = 7.0 Hz); <sup>13</sup>C NMR (125 MHz, CDCl<sub>3</sub>):  $\delta$  138.1, 122.5, 53.5, 52.2, 45.0, 34.0, 33.9, 30.7, 25.8, 25.7, 25.5, 20.3, 18.0;

MS (CI):  $m/z$  (%): 437 (1) [ $M^+ - Br$ ], 253 (32), 185 (100), 171 (24), 129 (78), 83 (46), 69 (40);

HRMS:  $m/z$ : calcd for  $C_{25}H_{45}N_2S_2$ : 437.3024; found: 437.3017.

### Ag (I) S/NHC/S Complex **7a**

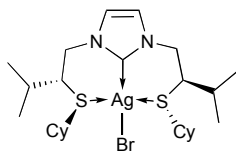

$Ag_2O$  (23 mg, 0.1 mmol) was added to a solution of **4a** (104 mg, 0.2 mmol) in dry  $CH_2Cl_2$  (4 mL) and the mixture was stirred vigorously for 2 h in the dark. The reaction mixture was filtered through Celite and the solvent removed in vacuo to give **7a** (105 mg, 84%) as a white foam.  $[\alpha]_D^{20} -27.7$  ( $c$  0.4 in  $CHCl_3$ );  $^1H$  NMR (300 MHz,  $CDCl_3$ ):  $\delta$  7.07 (2H, s), 4.29 (2H, dd,  $J = 14.1, 6.6$  Hz), 4.03 (2H, dd,  $J = 14.1, 8.7$  Hz), 2.93-2.89 (2H, m), 2.36-2.32 (2H, m), 1.95-1.80 (4H, m), 1.79-1.60 (6H, m), 1.58-1.56 (2H, m), 1.31-1.10 (10H, m), 1.04 (6H, d,  $J = 6.6$  Hz), 0.98 (6H, d,  $J = 6.9$  Hz);  $^{13}C$  NMR (125 MHz,  $CDCl_3$ ):  $\delta$  181.1, 121.8, 55.7, 53.5, 44.9, 34.1, 34.0, 30.3, 26.0, 25.8, 25.7, 20.4, 18.0; MS (CI):  $m/z$  (%): 580 (12), 545 (40), 543 (42), 501 (43), 499 (77), 185 (55), 129 (40), 83 (100), 69 (52), 61 (55); HRMS:  $m/z$ : calcd for  $C_{25}H_{44}N_2S_2BrAg$ : 622.1180; found: 622.1186.

### (*R*)-(1-Bromo-3-methylbutan-2-yl)(*tert*-butyl)sulfane (**2b**)

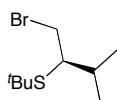

To a cooled (0 °C) solution of (*R*)-2-(*tert*-butylthio)-3-methylbutan-1-ol **1b** (640 mg, 3.63 mmol) in dry  $CH_2Cl_2$  (20 ml) was added triphenylphosphine (1.150 g, 4.34 mmol) and carbon tetrabromide (1.454 g, 4.34 mmol) under an argon atmosphere. The reaction mixture was stirred at 0 °C for 5 h, diluted with  $CH_2Cl_2$  and washed with water. The organic layer was dried, filtered, concentrated and extracted with hexane. The hexane extract was concentrated to afford crude **2b**, which was used in the subsequent alkylation step without further purification.  $^1H$  NMR (500 MHz,

$\text{CDCl}_3$ ):  $\delta$  4.16-4.12 (1H, m), 3.06-2.98 (2H, m), 2.03 (1H, m), 1.31 (9H, s), 1.01 (3H, d,  $J = 6.5$  Hz), 0.92 (3H, d,  $J = 6.5$  Hz);  $^{13}\text{C}$  NMR (125 MHz,  $\text{CDCl}_3$ ):  $\delta$  64.5, 43.1, 34.9, 31.5, 30.7, 21.9, 16.4.

**(R)-1-[2-(*tert*-Butylthio)-3-methylbutyl]-1H-imidazole (3b)**

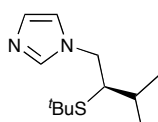

1H-Imidazole (171 mg, 2.51 mmol) was added to a solution of (*S*)-(1-bromo-3-methylbutan-2-yl)(*tert*-butyl)sulfane **2b** (300 mg, 1.25 mmol) in dry toluene (10 mL). The reaction mixture was stirred at 80 °C for 6 h and concentrated. The residue was diluted with  $\text{CH}_2\text{Cl}_2$  (20 mL) and washed with saturated  $\text{NaHCO}_3$  ( $2 \times 10$  mL) and brine (10 mL). The organic layer was dried ( $\text{Na}_2\text{SO}_4$ ) and concentrated. Flash chromatography (1:20 MeOH- $\text{CH}_2\text{Cl}_2$ ) gave **3b** (151 mg, 53%) as a yellow oil.  $[\alpha]_{\text{D}}^{20} +3.7$  ( $c$  0.75 in  $\text{CHCl}_3$ );  $^1\text{H}$  NMR (400 MHz,  $\text{CDCl}_3$ ):  $\delta$  7.47 (1H, s), 7.01 (1H, s), 6.90 (1H, s), 4.05 (1H, dd,  $J = 14.4, 8.2$  Hz), 3.98 (1H, dd,  $J = 14.4, 7.2$  Hz), 2.67-2.63 (1H, m), 1.79-1.72 (1H, m), 1.19 (9H, s), 0.97 (3H, d,  $J = 6.8$  Hz), 0.88 (3H, d,  $J = 6.8$  Hz);  $^{13}\text{C}$  NMR (100 MHz,  $\text{CDCl}_3$ ):  $\delta$  137.5, 129.2, 119.0, 50.9, 50.1, 42.9, 31.0, 29.5, 20.1, 17.2; MS (EI):  $m/z$  (%): 226 (30) [ $\text{M}^+$ ], 181 (22), 169 (23), 137 (35), 127 (25), 89 (43), 69 (100); HRMS:  $m/z$ : calcd for  $\text{C}_{12}\text{H}_{22}\text{N}_2\text{S}$ : 226.1504; found: 226.1503.

**(R,R)-1,3-Bis[2-(*tert*-butylthio)-3-methylbutyl]-3H-imidazol-1-ium bromide (4b)**

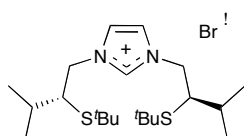

A solution of (*R*)-(1-bromo-3-methylbutan-2-yl)(*tert*-butyl)sulfane **2b** (174 mg, 0.73 mmol) in dry toluene (6 mL) was added dropwise to a solution of **3b** (150 mg, 0.66 mmol) in dry toluene (4 mL) and the reaction mixture was refluxed for 7 d. The mixture was then concentrated and the

residue purified by flash chromatography (1:15 MeOH-CH<sub>2</sub>Cl<sub>2</sub>) to give **4b** (89 mg, 30%) as a yellow syrupe.  $[\alpha]_D^{20} +2.7$  (*c* 1.0 in CHCl<sub>3</sub>); <sup>1</sup>H NMR (500 MHz, CDCl<sub>3</sub>): δ 10.85 (1H, s), 7.47 (2H, s), 4.65 (2H, dd, *J* = 14.0, 5.7 Hz), 4.08 (2H, dd, *J* = 14.0, 9.0 Hz), 3.13-3.05 (2H, m), 1.96-1.91 (2H, m), 1.17 (18H, s), 1.04 (6H, d, *J* = 6.5 Hz), 1.00 (6H, d, *J* = 7.0 Hz); <sup>13</sup>C NMR (125 MHz, CDCl<sub>3</sub>): δ 138.3, 123.0, 53.2, 49.3, 43.8, 31.4, 31.0, 20.0, 29.7, 18.4; MS (CI): *m/z* (%): 385 (3) [M<sup>+</sup>-Br], 227 (18), 159 (68), 137 (23), 103 (98), 89 (20), 69 (69), 57 (100); HRMS: *m/z*: calcd for C<sub>21</sub>H<sub>41</sub>N<sub>2</sub>S<sub>2</sub>: 385.2711; found: 385.2701.

### Ag (I) S/NHC/S Complex (7b)

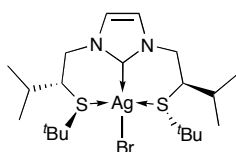

Ag<sub>2</sub>O (23 mg, 0.1 mmol) was added to a solution of **4b** (104 mg, 0.2 mmol) in dry CH<sub>2</sub>Cl<sub>2</sub> (4 mL) and the mixture was stirred vigorously for 5 h in the dark. The reaction mixture was filtered through Celite and the solvent removed in vacuo to give **7b** (108 mg, 95%) as a yellow foam.  $[\alpha]_D^{20} -124.1$  (*c* 1 in CHCl<sub>3</sub>); <sup>1</sup>H NMR (500 MHz, CDCl<sub>3</sub>): δ 7.05 (2H, s), 4.30 (2H, dd, *J* = 14.1, 7.1 Hz), 4.03 (2H, dd, *J* = 14.1, 8.1 Hz), 2.92 (2H, td, *J* = 7.7, 2.7 Hz), 1.87-1.84 (2H, m), 1.24 (18H, s), 1.04 (6H, d, *J* = 7.2 Hz), 1.02 (6H, d, *J* = 7.2 Hz); <sup>13</sup>C NMR (125 MHz, CDCl<sub>3</sub>): δ 181.1, 121.2, 54.3, 50.0, 42.9, 30.5, 29.8, 28.9, 18.9, 17.6; MS (CI): *m/z* (%): 493 (40), 491 (38), 449 (50), 447 (95), 390 (33), 159 (58), 103 (90), 69 (60), 57 (100); HRMS: *m/z*: calcd for C<sub>21</sub>H<sub>40</sub>N<sub>2</sub>S<sub>2</sub>BrAg: 570.0867; found: 570.0901.

### (R)-(1-Bromo-3-methylbutan-2-yl)(phenyl)sulfane (2c)

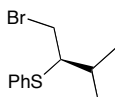

To a cooled (0 °C) solution of (*R*)-2-(phenylthio)-3-methylbutan-1-ol **1c** (1.55 g, 7.9 mmol) in dry CH<sub>2</sub>Cl<sub>2</sub> (43 mL) were added triphenylphosphine (2.52 g, 9.5 mmol) and carbon tetrabromide

(3.18 g, 9.5 mmol) under an argon atmosphere. The reaction mixture was stirred at 0 °C for 6 h, diluted with CH<sub>2</sub>Cl<sub>2</sub> and washed with water. The organic layer was dried, filtered, concentrated and extracted with hexane. The hexane extract was concentrated to afford crude **2c** as a yellow oil, which was used in the subsequent alkylation step without further purification. <sup>1</sup>H NMR (500 MHz, CDCl<sub>3</sub>): δ 7.39-7.23 (5H, m), 4.12 (1H, ddd, *J* = 9.0, 6.0, 3.0 Hz), 3.49 (1H, dd, *J* = 14.0, 6.0 Hz), 3.33 (1H, dd, *J* = 14.0, 9.0 Hz), 2.21-2.13 (1H, m), 1.02 (3H, d, *J* = 7.0 Hz), 0.93 (3H, d, *J* = 6.5 Hz); <sup>13</sup>C NMR (125 MHz, CDCl<sub>3</sub>): δ 132.2, 130.5, 129.4, 127.1, 63.1, 40.8, 31.3, 22.0, 16.7.

**(R)-1-[2-(Phenyl)-3-methylbutyl]-1H-imidazole (3c)**

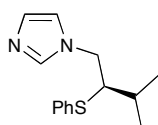

1*H*-Imidazole (381 mg, 5.6 mmol) was added to a solution of (*R*)-(1-bromo-3-methylbutan-2-yl)(phenyl)sulfane **2c** (725 mg, 2.8 mmol) in dry toluene (15 mL). The reaction mixture was stirred at 80 °C for 16 h and concentrated. The residue was diluted with CH<sub>2</sub>Cl<sub>2</sub> (20 mL) and washed with saturated NaHCO<sub>3</sub> (2 × 10 mL) and brine (10 mL). The organic layer was dried (Na<sub>2</sub>SO<sub>4</sub>) and concentrated. Flash chromatography (1:20 MeOH-CH<sub>2</sub>Cl<sub>2</sub>) gave **3c** (342 mg, 50%) as a yellow syrupe. [α]<sub>D</sub><sup>20</sup> -12.0 (*c* 1 in CHCl<sub>3</sub>); <sup>1</sup>H NMR (500 MHz, CDCl<sub>3</sub>): δ 7.43 (1H, s), 7.24-7.17 (5H, m), 6.97 (1H, s), 6.82 (1H, s), 4.11 (1H, dd, *J* = 14.5, 7.0 Hz), 4.01 (1H, dd, *J* = 14.5, 7.5 Hz), 3.17-3.12 (1H, m), 1.93-1.84 (1H, m), 1.09 (3H, d, *J* = 7.0 Hz), 0.99 (3H, d, *J* = 7.0 Hz); <sup>13</sup>C NMR (75 MHz, CDCl<sub>3</sub>): δ 137.5, 134.9, 132.2, 130.5, 129.2, 127.4, 119.2, 58.9, 49.8, 29.7, 20.6, 17.7; MS (CI): *m/z* (%): 247 (38) [M<sup>+</sup>+1], 246 (24) [M<sup>+</sup>], 179 (63), 165 (26), 137 (22), 123 (100); HRMS: *m/z*: calcd for C<sub>14</sub>H<sub>19</sub>N<sub>2</sub>S: 247.1269; found: 247.1266.

**(*R,R*)-1,3-Bis[2-(phenylthio)-3-methylbutyl]-3*H*-imidazol-1-ium bromide (**7c**)**

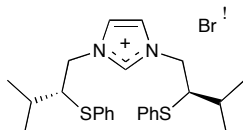

A solution of (*R*)-(1-bromo-3-methylbutan-2-yl)(phenyl)sulfane **2c** (505 mg, 1.95 mmol) in dry toluene (5 mL) was added dropwise to a solution of **4c** (320 mg, 1.30 mmol) in dry toluene (5 mL) and the reaction mixture was refluxed for 7 d. The mixture was concentrated and the residue purified by flash chromatography (1:20 MeOH-CH<sub>2</sub>Cl<sub>2</sub>) to give **7c** (315 mg, 48%) as a yellow sirupe.  $[\alpha]_D^{20}$   $-5.7$  (*c* 0.5 in CHCl<sub>3</sub>); <sup>1</sup>H NMR (400 MHz, CDCl<sub>3</sub>):  $\delta$  10.44 (1H, s), 7.31-7.13 (12H, m), 4.67 (2H, dd, *J* = 13.8, 3.8 Hz), 4.01 (2H, dd, *J* = 13.8, 9.8 Hz), 3.65-3.62 (2H, m), 2.11-2.04 (2H, m), 1.15 (6H, d, *J* = 6.7 Hz), 1.06 (6H, d, *J* = 6.8 Hz); <sup>13</sup>C NMR (100 MHz, CDCl<sub>3</sub>):  $\delta$  138.0, 134.2, 130.8, 129.1, 127.0, 122.3, 56.8, 53.1, 30.5, 20.3, 18.3; MS (FAB): *m/z* (%): 425 (16) [*M*<sup>+</sup>-Br], 123 (34), 95 (37), 81 (22), 69 (57), 57 (100); HRMS: *m/z*: calcd for C<sub>25</sub>H<sub>33</sub>N<sub>2</sub>S<sub>2</sub>: 425.2085; found: 425.2084.

**Ag (I) S/NHC/S Complex **7c****

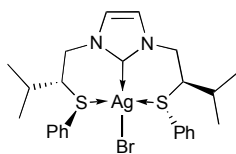

Ag<sub>2</sub>O (23 mg, 0.1 mmol) was added to a solution of **4c** (101 mg, 0.2 mmol) in dry CH<sub>2</sub>Cl<sub>2</sub> (4 mL) and the mixture was stirred vigorously for 5 h in the dark. The reaction mixture was filtered through Celite and the solvent removed in vacuo to give **7c** (115 mg, 94%) as a yellow foam.  $[\alpha]_D^{20}$   $-21.6$  (*c* 0.35 in CHCl<sub>3</sub>); <sup>1</sup>H NMR (500 MHz, CDCl<sub>3</sub>):  $\delta$  7.30-7.16 (10H, m), 6.92 (2H, s), 4.30 (2H, dd, *J* = 14.1, 5.8 Hz), 3.98 (2H, dd, *J* = 14.1, 8.8 Hz), 3.45 (2H, ddd, *J* = 8.8, 5.8, 3.4 Hz), 2.01-1.95 (2H, m), 1.13 (6H, d, *J* = 6.8 Hz), 1.08 (6H, d, *J* = 6.8 Hz); <sup>13</sup>C NMR (125 MHz, CDCl<sub>3</sub>):  $\delta$  181.2, 134.6, 131.2, 129.1, 127.0, 121.7, 58.4, 54.5, 30.1, 20.2, 18.4; MS (FAB): *m/z* (%): 425 (39) [*M*<sup>+</sup>-Ag-Br], 133 (19), 123 (100), 95 (37), 81 (10), 69 (20).

**(R)-(1-Bromo-3-methylbutan-2-yl)(benzyl)sulfane (2d)**

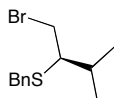

To a cooled (0 °C) solution of (*R*)-2-benzylsulfanyl-3-methylbutan-1-ol **1d** (1.0 g, 4.8 mmol) in dry CH<sub>2</sub>Cl<sub>2</sub> (20 mL) were added triphenylphosphine (1.54 g, 5.7 mmol) and carbon tetrabromide (1.90 g, 5.7 mmol) under an argon atmosphere. The reaction mixture was stirred at 0 °C for 3 h, diluted with CH<sub>2</sub>Cl<sub>2</sub> and washed with water. The organic layer was dried, filtered, concentrated and extracted with hexane. The hexane extract was concentrated to afford crude **2d**, which was used in the subsequent alkylation step without further purification. <sup>1</sup>H NMR (400 MHz, CDCl<sub>3</sub>): δ 7.32-7.29 (5H, m), 3.98 (1H, ddd, *J* = 8.4, 6.4, 3.0 Hz), 3.78-3.70 (2H, m), 2.95 (1H, dd, *J* = 14.0, 6.4 Hz), 2.88 (1H, dd, *J* = 14.0, 8.4 Hz), 2.04-2.00 (1H, m), 0.95 (3H, d, *J* = 6.8 Hz), 0.86 (3H, d, *J* = 6.4 Hz); <sup>13</sup>C NMR (100 MHz, CDCl<sub>3</sub>): δ 138.2, 128.9, 128.7, 127.4, 65.9, 63.8, 37.9, 37.1, 29.8, 16.7.

**(R)-1-[2-(Benzylthio)-3-methylbutyl]-1H-imidazole (3d)**

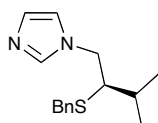

1*H*-Imidazole (286 mg, 4.2 mmol) was added to a solution of (*R*)-(1-bromo-3-methylbutan-2-yl)(benzyl)sulfane **2d** (570 mg, 2.10 mmol) in dry toluene (10 mL). The reaction mixture was stirred at 80 °C for 40 h and concentrated. The residue was diluted with CH<sub>2</sub>Cl<sub>2</sub> (20 mL) and washed with saturated NaHCO<sub>3</sub> (2 × 10 mL) and brine (10 mL). The organic layer was dried (Na<sub>2</sub>SO<sub>4</sub>) and concentrated. The residue was purified by flash chromatography (1:20 MeOH-CH<sub>2</sub>Cl<sub>2</sub>) to afford **3d** (313 mg, 57%) as a orange oil. [ $\alpha$ ]<sub>D</sub><sup>20</sup> -22.2 (*c* 1 in CHCl<sub>3</sub>); <sup>1</sup>H NMR (400 MHz, CDCl<sub>3</sub>): δ 7.44 (1H, s), 7.29-7.17 (5H, m), 7.04 (1H, s), 6.83 (1H, s), 4.03 (1H, dd, *J* = 14.0, 6.8 Hz), 3.86 (1H, dd, *J* = 14.0, 8.2 Hz), 3.44 (1H, d, *J* = 13.2 Hz), 3.21 (1H, d, *J* = 13.2 Hz), 2.54-2.50 (1H, m), 1.78-1.70 (1H, m), 0.87 (6H, d, *J* = 6.8 Hz); <sup>13</sup>C NMR (100 MHz, CDCl<sub>3</sub>): δ 137.7,



137.5, 129.7, 129.3, 128.4, 127.1, 119.1, 52.9, 50.8, 36.4, 29.6, 20.3, 17.3; MS (EI):  $m/z$  (%): 260 (25) [ $M^+$ ], 179 (22), 169 (22), 137 (28), 91 (100), 82 (21); HRMS:  $m/z$ : calcd for  $C_{15}H_{20}N_2S$ : 260.1347; found: 260.1345.

### (*R,R*)-1,3-Bis[2-(benzylthio)-3-methylbutyl]-3*H*-imidazol-1-ium bromide (**4d**)

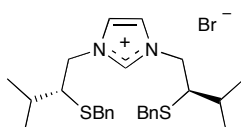

A solution of (*R*)-(1-bromo-3-methylbutan-2-yl)(benzyl)sulfane **2d** (570 mg, 2.1 mmol) in dry toluene (10 mL) was added dropwise to a solution of **3d** (313 mg, 1.20 mmol) in dry toluene (4 mL) and the reaction mixture was refluxed for 7 d. The mixture was then concentrated and the residue purified by flash chromatography (1:20 MeOH- $CH_2Cl_2$ ) to give **4d** (275 mg, 43%) as a white solid. M.p. 60–63 °C.  $[\alpha]_D^{20}$  -20.4 ( $c$  1.0 in  $CHCl_3$ );  $^1H$  NMR (500 MHz,  $CDCl_3$ ):  $\delta$  10.13 (1H, s), 7.31-7.11 (12H, m), 4.53 (2H, dd,  $J$  = 14.0, 5.0 Hz), 3.97 (2H, dd,  $J$  = 14.0, 9.7 Hz), 3.63 (2H, d,  $J$  = 13.4 Hz), 3.55 (2H, d,  $J$  = 13.4 Hz), 2.89-2.86 (2H, m), 1.99-1.95 (2H, m), 1.01 (6H, d,  $J$  = 6.5 Hz), 0.96 (6H, d,  $J$  = 6.5 Hz);  $^{13}C$  NMR (125 MHz,  $CDCl_3$ ):  $\delta$  138.0, 129.0, 128.6, 127.2, 121.9, 52.9, 52.7, 37.0, 30.6, 20.3, 18.0; MS (FAB):  $m/z$  (%): 453 (75) [ $M^+-Br$ ], 237 (8), 193 (25), 137 (56), 102 (49), 91 (100); HRMS:  $m/z$ : calcd for  $C_{27}H_{37}N_2S_2$ : 453.2398; found: 453.2406.

### Ag (I) S/NHC/S Complex **7d**

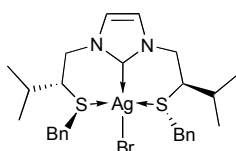

$Ag_2O$  (23 mg, 0.1 mmol) was added to a solution of **4d** (107 mg, 0.2 mmol) in dry  $CH_2Cl_2$  (4 mL) and the mixture was stirred vigorously for 5 h in the dark. The reaction mixture was filtered through Celite and the solvent removed in vacuo to give **7d** (118 mg, 92%) as a white foam.  $[\alpha]_D^{20}$  -91.6 ( $c$  1 in  $CHCl_3$ );  $^1H$  NMR (500 MHz,  $CDCl_3$ ):  $\delta$  7.31-7.17 (10H, m), 6.85 (2H, s), 4.21

(2H, dd,  $J = 14.0, 5.8$  Hz), 3.82 (2H, dd,  $J = 14.0, 9.1$  Hz), 3.50 (2H, d,  $J = 13.4$  Hz), 3.44 (2H, d,  $J = 13.4$  Hz), 2.78-2.74 (2H, m), 1.90-1.86 (2H, m), 0.99 (6H, d,  $J = 6.8$  Hz), 0.96 (6H, d,  $J = 6.8$  Hz);  $^{13}\text{C}$  NMR (125 MHz,  $\text{CDCl}_3$ ):  $\delta$  181.2, 137.8, 129.1, 128.5, 127.1, 121.5, 54.8, 53.7, 37.0, 30.3, 20.1, 18.2. MS (EI):  $m/z$  (%): 453 (56) [ $\text{M}^+ - \text{Ag} - \text{Br}$ ], 193 (22), 137 (73), 91 (100), 69 (24); HRMS:  $m/z$ : calcd for  $\text{C}_{27}\text{H}_{37}\text{N}_2\text{S}_2$ : 453.2398; found: 453.2423.

### (*R*)-1-[2-(Cyclohexylthio)-3-methylbutyl]-1*H*-benzo[*d*]imidazole (**5**)

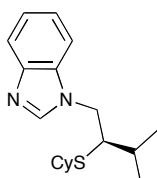

1*H*-Benzo[*d*]imidazole (1.06 g, 9.0 mmol) was added to a solution of (*R*)-(1-bromo-3-methylbutan-2-yl)(cyclohexyl)sulfane **2a** (1.4 g, 4.5 mmol) in dry toluene (20 mL). The reaction mixture was stirred at 80 °C for 24 h, washed with saturated  $\text{NaHCO}_3$  ( $2 \times 10$  mL), dried ( $\text{Na}_2\text{SO}_4$ ), concentrated, and the resulting residue was purified by flash chromatography (1:40 MeOH- $\text{CH}_2\text{Cl}_2$ ) to give **5** (920 mg, 68%) as a yellow syrupe.  $[\alpha]_{\text{D}}^{20} -36.5$  ( $c$  0.6 in  $\text{CHCl}_3$ );  $^1\text{H}$  NMR (300 MHz,  $\text{CDCl}_3$ ):  $\delta$  8.01 (1H, s), 7.85-7.82 (1H, m), 7.41-7.36 (1H, m), 7.33-7.26 (2H, m), 4.43 (1H, dd,  $J = 14.4, 6.0$  Hz), 4.19 (1H, dd,  $J = 14.4, 9.0$  Hz), 2.93 (1H, ddd,  $J = 9.0, 6.0, 3.3$  Hz), 2.00-1.85 (2H, m), 1.80-1.71 (1H, m), 1.66-1.42 (5H, m), 1.18-1.00 (4H, m), 1.09 (3H, d,  $J = 6.9$  Hz), 1.06 (3H, d,  $J = 6.9$  Hz);  $^{13}\text{C}$  NMR (75 MHz,  $\text{CDCl}_3$ ):  $\delta$  143.8, 133.6, 122.9, 122.1, 120.6, 109.3, 51.0, 49.5, 44.5, 33.9, 33.7, 30.7, 25.9, 25.8, 25.5, 20.4, 17.9; MS (EI):  $m/z$  (%): 302 (27), 171 (100), 132 (42), 89 (94), 83 (26), 55 (50); HRMS  $m/z$  calcd. for  $\text{C}_{18}\text{H}_{26}\text{N}_2\text{S}$  302.1817, found 302.1813.

### (*R,R*)-1,3-Bis[2-(cyclohexylthio)-3-methylbutyl]-3*H*-benzo[*d*]imidazol-1-ium bromide (**6**)

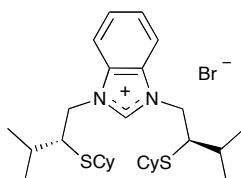

A solution of (*R*)-(1-bromo-3-methylbutan-2-yl)(cyclohexyl)sulfane **2a** (1.4 g, 4.5 mmol) in dry toluene (5 mL) was added dropwise to a solution of **5** (920 mg, 3.05 mmol) in dry toluene (10 mL). The mixture was refluxed for 85 h, concentrated, and the residue was purified by flash chromatography (1:30 MeOH-CH<sub>2</sub>Cl<sub>2</sub>) to afford **6** (1.06 g, 61%) as a light brown foam and 300 mg (33%) of unreacted starting material **5**. Data for **6**:  $[\alpha]_{\text{D}}^{20} +23.8$  (*c* 0.8 in CHCl<sub>3</sub>); <sup>1</sup>H NMR (500 MHz, CDCl<sub>3</sub>): δ 11.47 (1H, s), 7.53 (2H, dd, *J* = 6.5, 3.0 Hz), 7.64 (2H, dd, *J* = 6.5, 3.0 Hz), 4.85 (2H, dd, *J* = 14.5, 6.5 Hz), 4.53 (2H, dd, *J* = 14.5, 9.0 Hz), 3.29 (2H, ddd, *J* = 9.0, 6.5, 3.3 Hz), 2.43-2.41 (2H, m), 2.01-1.98 (2H, m), 1.92-1.83 (3H, m), 1.68-1.62 (2H, m), 1.55-1.44 (7H, m), 1.24-1.18 (5H, m), 1.11 (6H, d, *J* = 6.5 Hz), 1.06 (6H, d, *J* = 6.5 Hz), 0.95-0.90 (3H, m); <sup>13</sup>C NMR (125 MHz, CDCl<sub>3</sub>): δ 144.0, 131.5, 126.9, 113.4, 51.4, 50.6, 44.7, 34.0, 33.9, 30.5, 25.7, 25.7, 25.5, 20.2, 18.0; MS (FAB): *m/z* (%): 487 (46) [M<sup>+</sup>], 185 (37), 147 (28), 129 (100), 83 (55); HRMS: *m/z*: calcd for C<sub>29</sub>H<sub>47</sub>N<sub>2</sub>S<sub>2</sub>: 487.3181; found: 487.3165.

### Ag (I) S/NHC/S Complex **8**

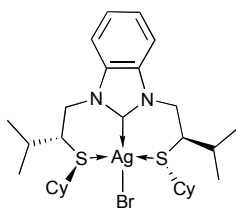

Ag<sub>2</sub>O (23 mg, 0.1 mmol) was added to a solution of **6** (113 mg, 0.2 mmol) in dry CH<sub>2</sub>Cl<sub>2</sub> (4 mL) and the mixture was stirred vigorously for 2 h in the dark. The reaction mixture was then filtered through Celite and the solvent removed *in vacuo* to afford **8** (122 mg, 84%) as a light brown foam.  $[\alpha]_{\text{D}}^{20} +35.5$  (*c* 0.6 in CHCl<sub>3</sub>); <sup>1</sup>H NMR (300 MHz, CDCl<sub>3</sub>): δ 7.56 (2H, dd, *J* = 6.0, 3.0 Hz), 7.45 (2H, dd, *J* = 6.0, 3.0 Hz), 4.59 (2H, dd, *J* = 14.4, 7.2 Hz), 4.45 (2H, dd, *J* = 14.4, 7.2 Hz), 3.20-3.15 (2H, m), 2.43-2.32 (2H, m), 1.97-1.82 (4H, m), 1.75-1.47 (9H, m), 1.30-1.16 (9H, m), 1.10 (6H, d, *J* = 6.6 Hz), 1.08 (6H, d, *J* = 6.0 Hz); <sup>13</sup>C NMR (125 MHz, CDCl<sub>3</sub>): δ 190.7, 134.0, 124.1, 111.7, 52.6, 52.6, 44.7, 34.0, 30.1, 25.8, 25.7, 25.6, 20.5, 18.1; MS (CI): *m/z* (%): 595 (35), 593

(34), 549 (45), 303 (43), 185 (100), 129 (51), 83 (61); HRMS:  $m/z$ : calcd for  $C_{29}H_{46}N_2S_2BrAg$ : 672.1337; found: 672.1329.

### (*R,R*)-1,3-Bis(2-(cyclohexylthio)-3-methylbutyl)-3H-imidazol-1-ium chloride (**9**)

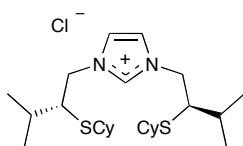

To a solution of **4a** (600 mg, 1.16 mmol) in MeOH (25 mL), was added Dowex® 22 (Cl) exchange anion resin (2.5 g). The reaction mixture was stirred until the starting material was consumed (TLC). The mixture was then filtered and concentrated. The resulting residue was dissolved in  $CH_2Cl_2$ , dried ( $Na_2SO_4$ ) and concentrated to yield **9** (530 mg, 97%) as a white foam.  $^1H$ -NMR (400 MHz,  $CDCl_3$ ):  $\delta$  10.85 (s, 1H), 7.52 (s, 2H), 4.72 (dd, 2H,  $J = 14.0, 5.2$  Hz), 4.11 (dd, 2H,  $J = 14.0, 9.6$  Hz), 2.97 (m, 2H), 2.36 (m, 2H), 2.04-1.94 (m, 2H), 1.92-1.85 (m, 2H), 1.74-1.59 (m, 6H), 1.54-1.48 (m, 2H), 1.28-1.13 (m, 10H), 1.06 (d, 6H,  $J = 6.4$  Hz), 0.96 (d, 6H,  $J = 6.8$  Hz).  $^{13}C$ -NMR (125 MHz,  $CDCl_3$ ):  $\delta$  138.9, 122.3, 53.6, 52.5, 45.1, 34.1, 33.9, 30.9, 25.9, 25.8, 25.5, 20.3, 18.0.  $[\alpha]_D^{20} = +5.8$  ( $c$  1.0,  $CHCl_3$ ). HRMS  $m/z$  calcd. for  $C_{25}H_{45}N_2S_2$  437.3024, found 437.3020.

### Palladium complex **10**

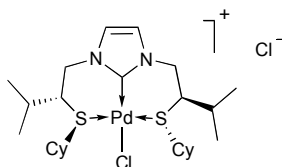

**Method A:** To a solution of **9** (56 mg, 0.11 mmol) in dry DMF (2.2 mL) was added  $PdCl_2$  (19.6 mL, 0.11 mmol) and the reaction mixture was refluxed overnight under an argon atmosphere. The mixture was concentrated and the residue was purified by flash chromatography (1:10 MeOH- $CH_2Cl_2$ ) to afford **10** as a yellow syrupe. Trituration with diethyl ether gave **10** (64 mg, 96%) as a light yellow powder.

**Method B:** To a solution of **9** (96 mg, 0.2 mmol) in dry CH<sub>2</sub>Cl<sub>2</sub> (4 mL) was added Ag<sub>2</sub>O (22 mg, 0.1 mmol) and the reaction mixture was vigorously stirred for 1 h in the dark. [PdCl<sub>2</sub>(CH<sub>3</sub>CN)<sub>2</sub>] (52 mg, 0.2 mmol) was then added and the reaction mixture was stirred at rt overnight. The mixture was filtered through Celite and concentrated. The resulting residue was purified by flash chromatography (1:10 MeOH-CH<sub>2</sub>Cl<sub>2</sub>) to afford **10** as a yellow syrupe. Trituration with diethyl ether gave **10** as light yellow powder (105 mg, 86%). X-Ray quality crystals were grown by slow diffusion of hexane into a solution of **10** in CH<sub>2</sub>Cl<sub>2</sub>. M.p. = 124-126 °C (dec.). <sup>1</sup>H-NMR (500 MHz, CDCl<sub>3</sub>): δ 8.35 (s, 2H), 5.31 (d, 2H, *J* = 12.5 Hz), 3.93 (t, 2H, *J* = 12.5 Hz), 2.94 (d, 2H, *J* = 10.0 Hz), 2.89 (t, 2H, *J* = 12.5 Hz), 2.37-2.30 (m, 2H), 2.13-2.08 (m, 2H), 1.92-1.76 (m, 10H), 1.69-1.64 (m, 2H), 1.59-1.51 (m, 2H), 1.35-1.28 (m, 4H), 1.26 (d, 6H, *J* = 7.0 Hz), 1.23 (d, 6H, *J* = 7.0 Hz). <sup>13</sup>C-NMR (125 MHz, CDCl<sub>3</sub>): δ 150.0, 124.0, 54.5, 52.0, 36.2, 33.1, 31.6, 26.9, 26.7, 24.7, 19.8, 19.5. [ $\alpha$ ]<sub>D</sub><sup>20</sup> = -95.2 (*c* 1.4, CHCl<sub>3</sub>). *m/z* (FAB) 577 (5, M<sup>+</sup> -Cl), 459 (22), 129 (100). HRMS *m/z* calcd. for C<sub>25</sub>H<sub>44</sub>N<sub>2</sub>S<sub>2</sub>ClPd (M<sup>+</sup>-Cl) 577.1669, found 577.1711.

### General procedure for the catalytic cycloaddition reaction

To a suspension of imino glycinate **11-16** (0.15 mmol) and the catalyst ( $7.5 \times 10^{-3}$  μmol, 5 mol%) in Et<sub>2</sub>O (0.25 mL) was added *i*Pr<sub>2</sub>EtN (3 μL, 0.015 mmol, 10 mol%) and the mixture was stirred in dark for 1 h at -25 °C. Then, *tert*-butyl acrylate (27 μL, 0.18 mmol) was added and the mixture was stirred at this temperature for 3 d. The solvent was then removed in vacuo and the residue was purified by flash chromatography (1:1 Et<sub>2</sub>O-hexane) to yield the product **22-27**.

Compounds **22-25** and **27** had spectral and analytical data in good agreement with those previously reported in the literature.<sup>4</sup>

<sup>4</sup> C. Chen, X. Li and Stuart L. Schreiber, *J. Am. Chem. Soc.*, 2003, **125**, 10174.

***tert*-Butyl (2*R*,4*R*,5*S*)-2-methoxycarbonyl-5-(4-chlorophenyl)pyrrolidin-4-carboxylate (26)**

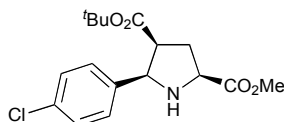

Following the general procedure described above, compound **26** (36 mg, 70%) was obtained as a white solid in 80% ee [Chiralpak AS, 90:10 hexane: *i*-PrOH, flow = 1 mL/min, T = 30 °C;  $t_r$  = 5.7 min (major),  $t_r$  = 12.9 min (minor)]. M.p. = 78–80 °C;  $[\alpha]_D^{20}$  –12.3 (*c* 0.9 in CHCl<sub>3</sub>); <sup>1</sup>H NMR (300 MHz, CDCl<sub>3</sub>): δ 7.34-7.29 (4H, m), 2.20-1.96 (1H, d, *J* = 7.9 Hz), 3.92 (1H, t, *J* = 8.4 Hz), 3.82 (3H, s), 3.25 (1H, q, *J* = 7.8 Hz), 2.56 (1H, br s), 2.48-2.27 (2H, m), 1.07 (9H, s); <sup>13</sup>C NMR (75 MHz, CDCl<sub>3</sub>): δ 173.6, 171.6, 138.0, 133.1, 128.7, 128.2, 80.9, 64.8, 59.8, 52.3, 50.1, 33.9, 27.6; MS (CI): *m/z* (%): 340 (18) [M<sup>+</sup>+1], 339 (9) [M<sup>+</sup>], 284 (100), 282 (43), 224 (31), 211 (30), 151 (15); HRMS: *m/z*: calcd for C<sub>17</sub>H<sub>23</sub>ClNO<sub>4</sub>: 340.3016; found: 340.3017.

Enantiomeric excesses of cycloadducts **22-27** were determined by HPLC on a Chiralpak AS column using 90:10 hexane: *i*-PrOH as eluent, flow = 1 mL/min and T = 30 °C. Data for **22**:  $t_r$  = 5.2 min (major),  $t_r$  = 8.1 min (minor). Data for **23**:  $t_r$  = 4.8 min (major),  $t_r$  = 24.8 min (minor). Data for **24**:  $t_r$  = 13.7 min (major),  $t_r$  = 16.6 min (minor). Data for **25**:  $t_r$  = 6.1 min (major),  $t_r$  = 12.8 min (minor). Data for **26**:  $t_r$  = 5.7 min (major),  $t_r$  = 12.9 min (minor). Data for **27**:  $t_r$  = 6.7 min (major),  $t_r$  = 12.4 min (minor).

## NMR SPECTRA

$^1\text{H}$  NMR ( $\text{CDCl}_3$ , 500 MHz)

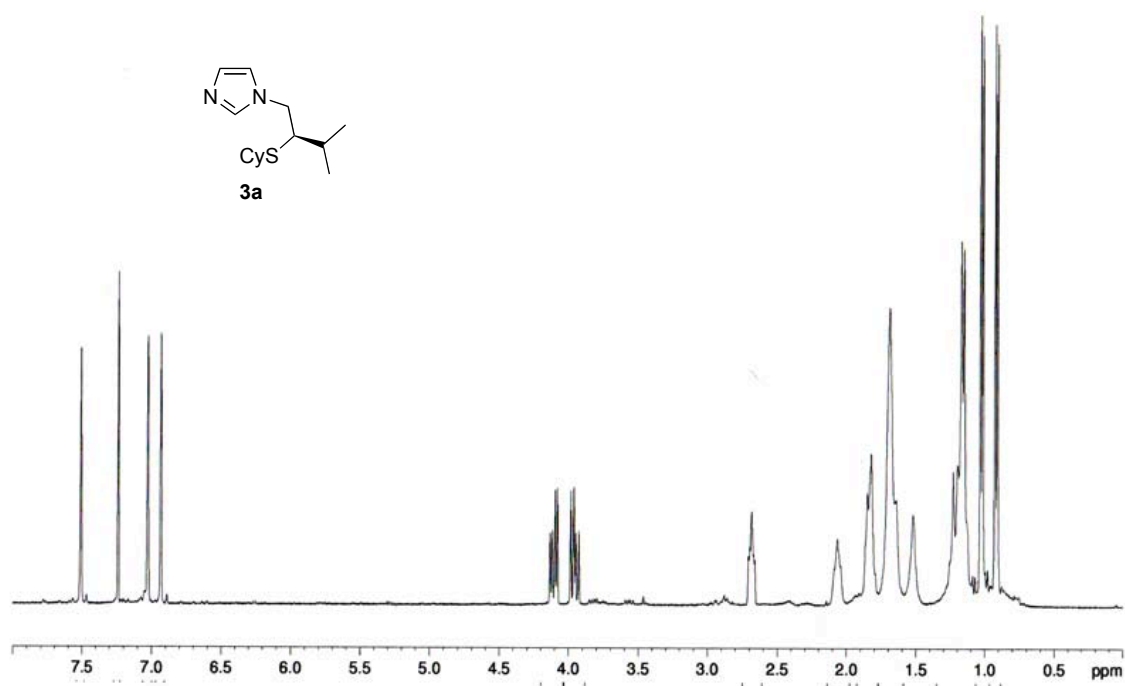

$^{13}\text{C}$  NMR ( $\text{CDCl}_3$ , 125 MHz)

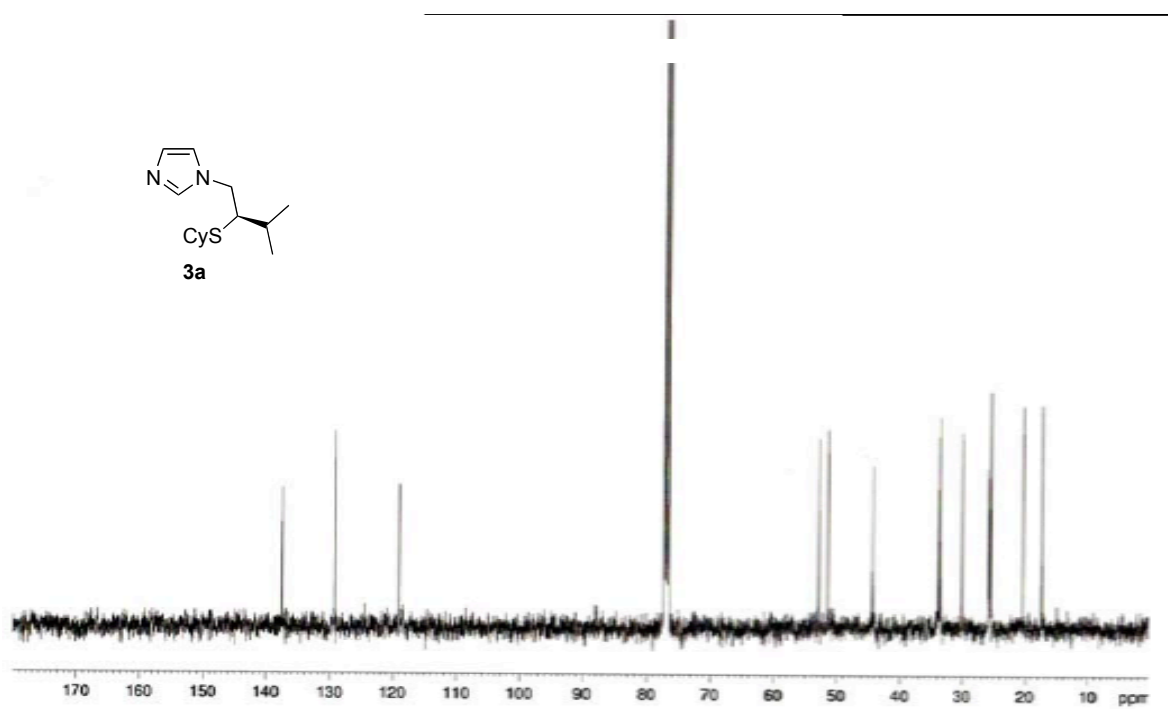

$^1\text{H}$  NMR ( $\text{CDCl}_3$ , 500 MHz)

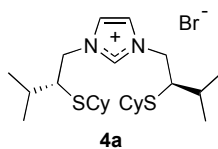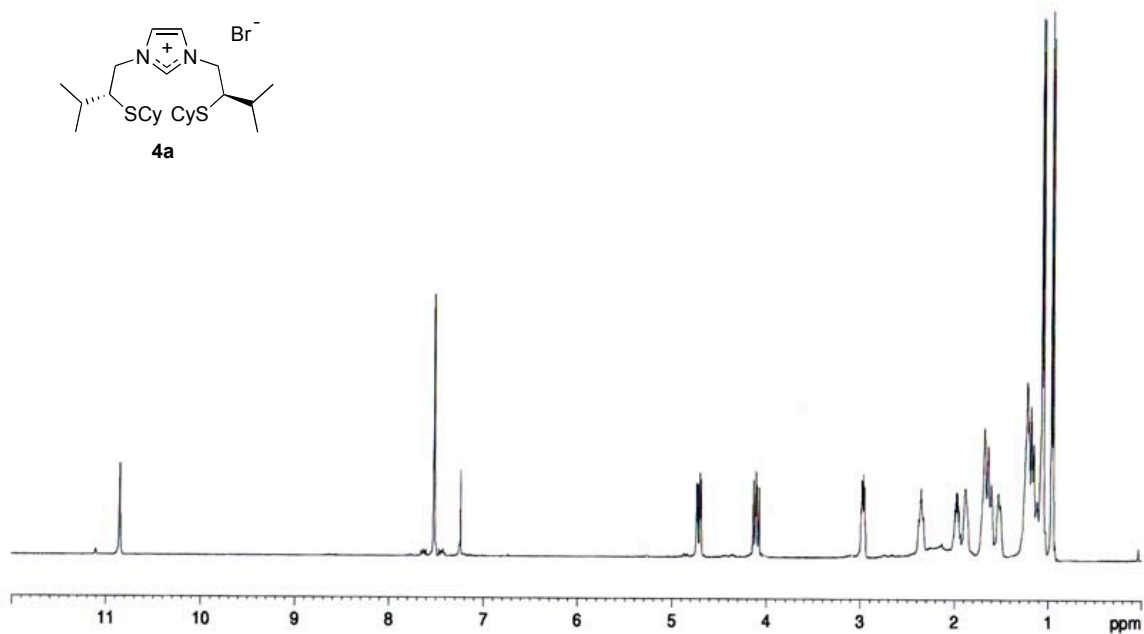

<sup>13</sup>C NMR (CDCl<sub>3</sub>, 125 MHz)

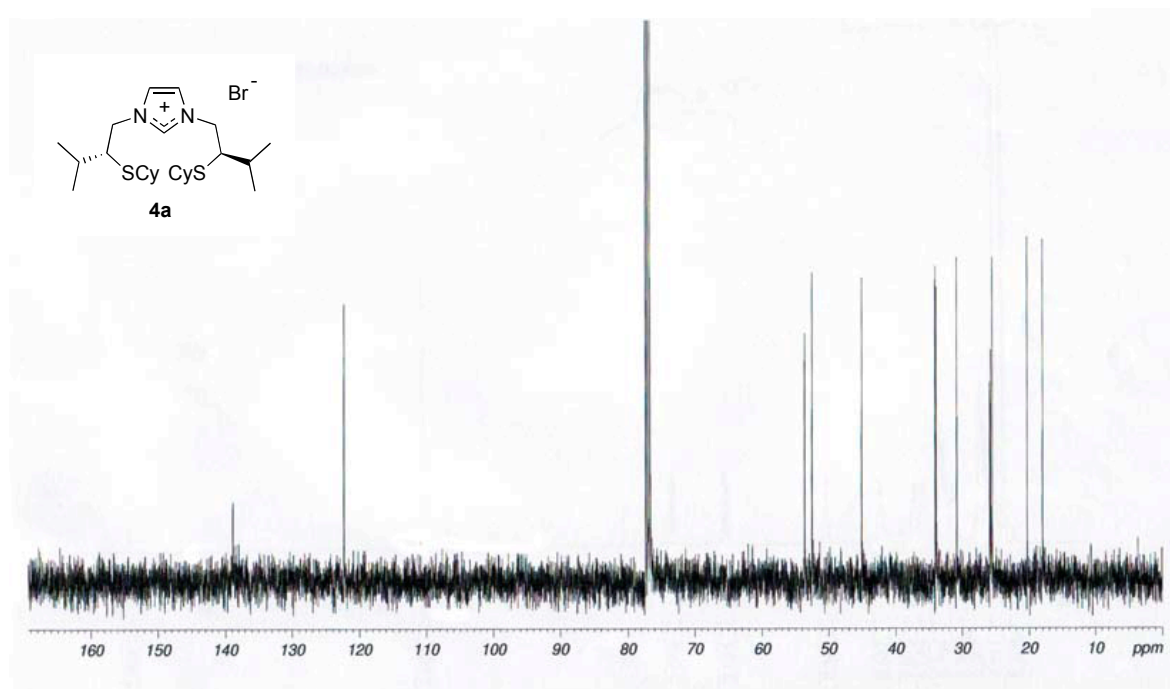

<sup>1</sup>H-RMN (CDCl<sub>3</sub>, 500 MHz)



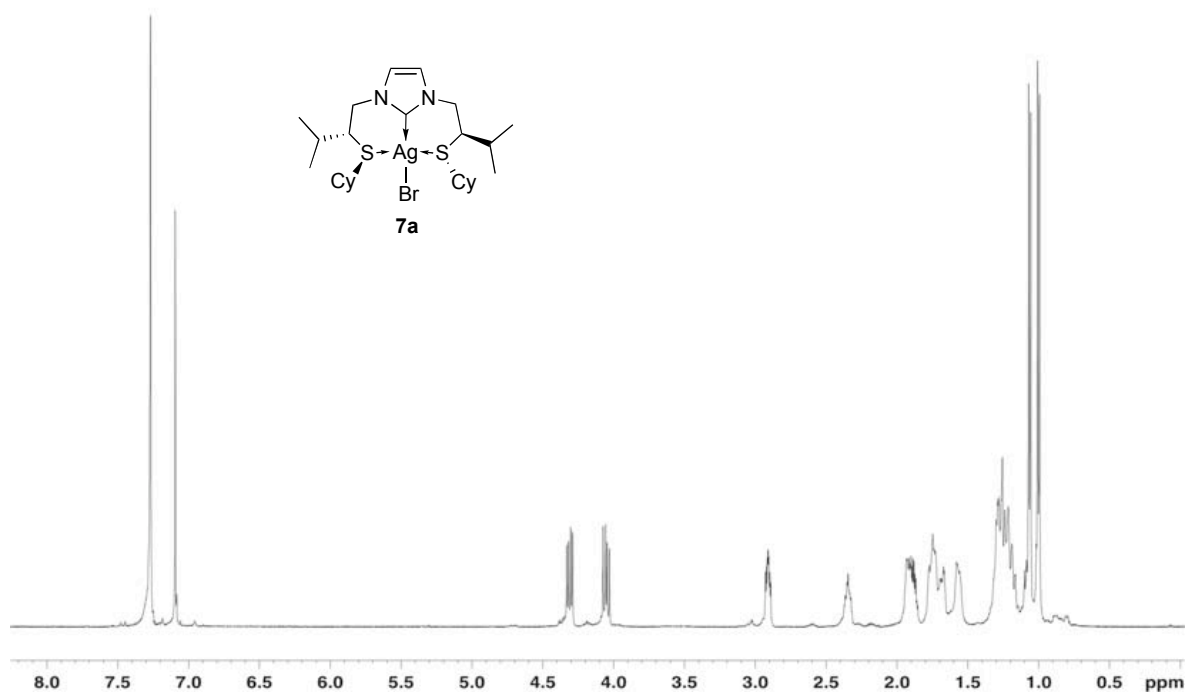

$^{13}\text{C}$  NMR ( $\text{CDCl}_3$ , 125 MHz)

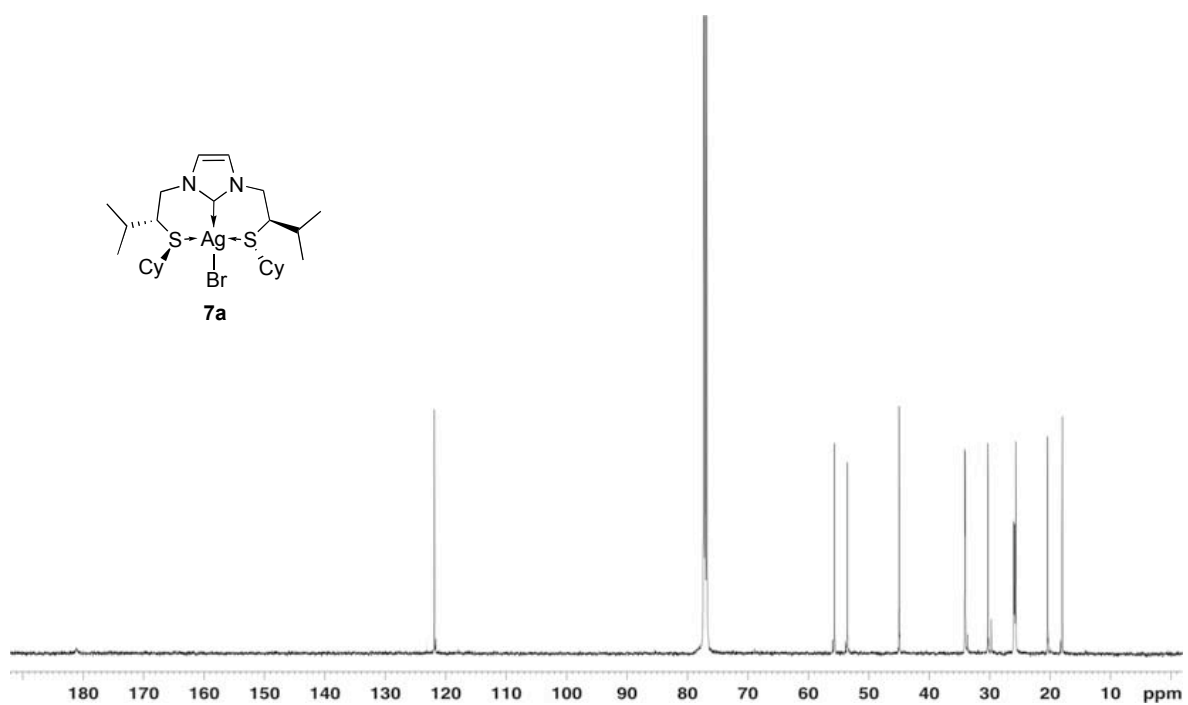

$^1\text{H}$ -RMN ( $\text{CDCl}_3$ , 300 MHz)

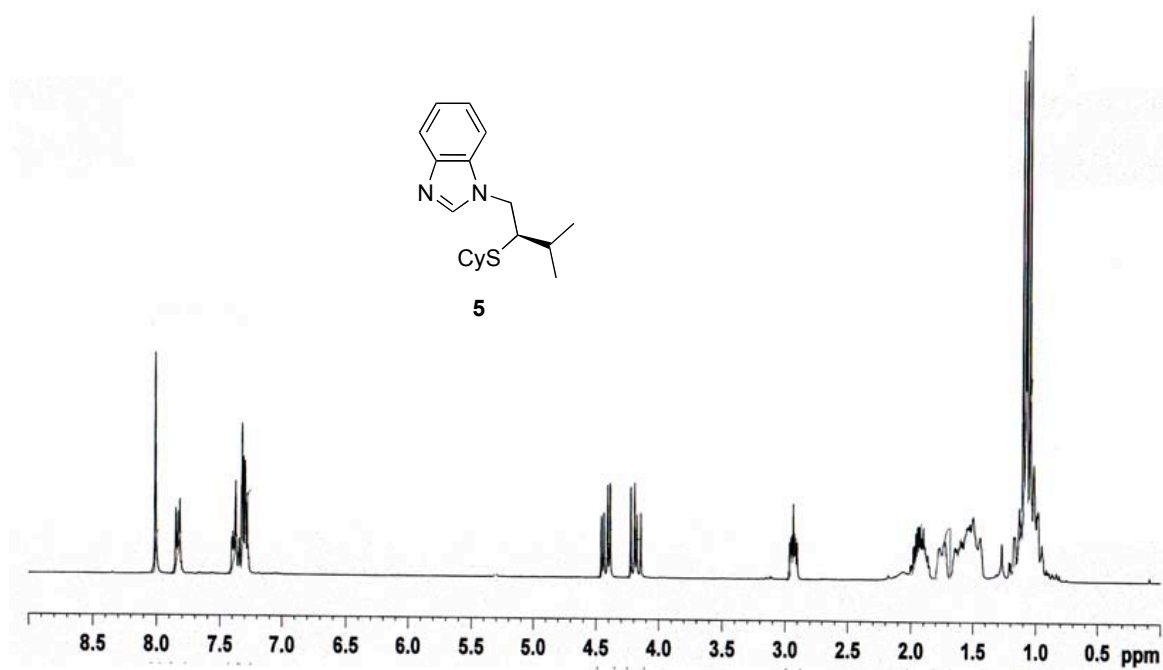

<sup>13</sup>C NMR (CDCl<sub>3</sub>, 75 MHz)

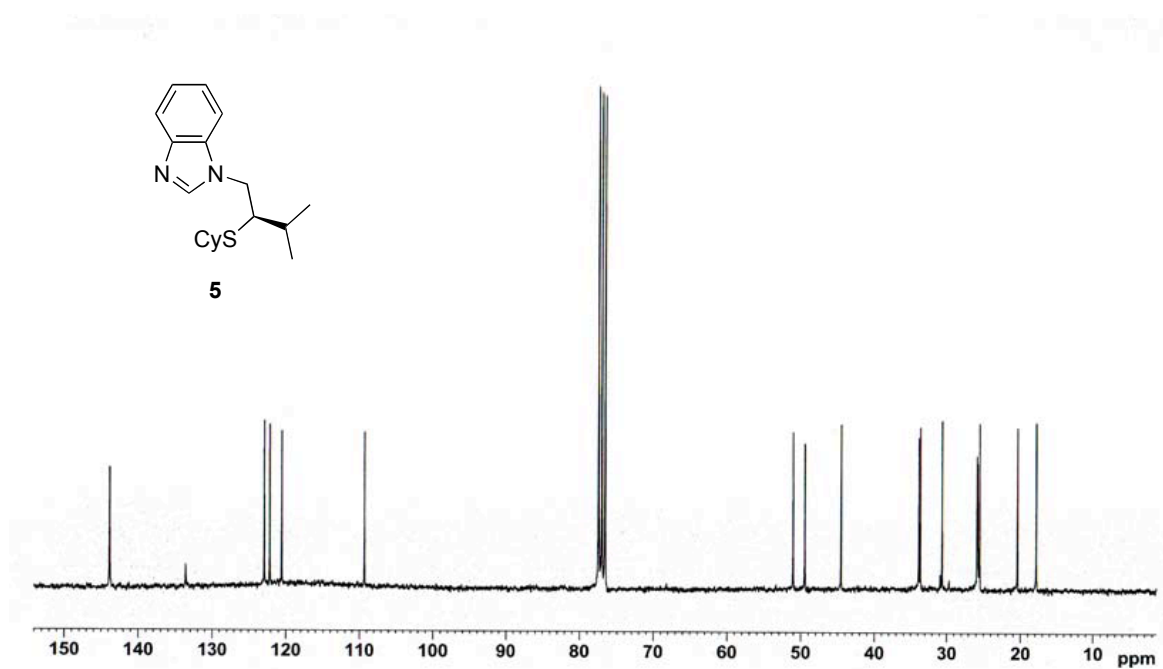

<sup>1</sup>H NMR (CDCl<sub>3</sub>, 500 MHz)

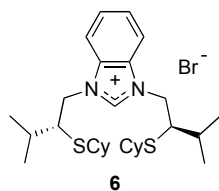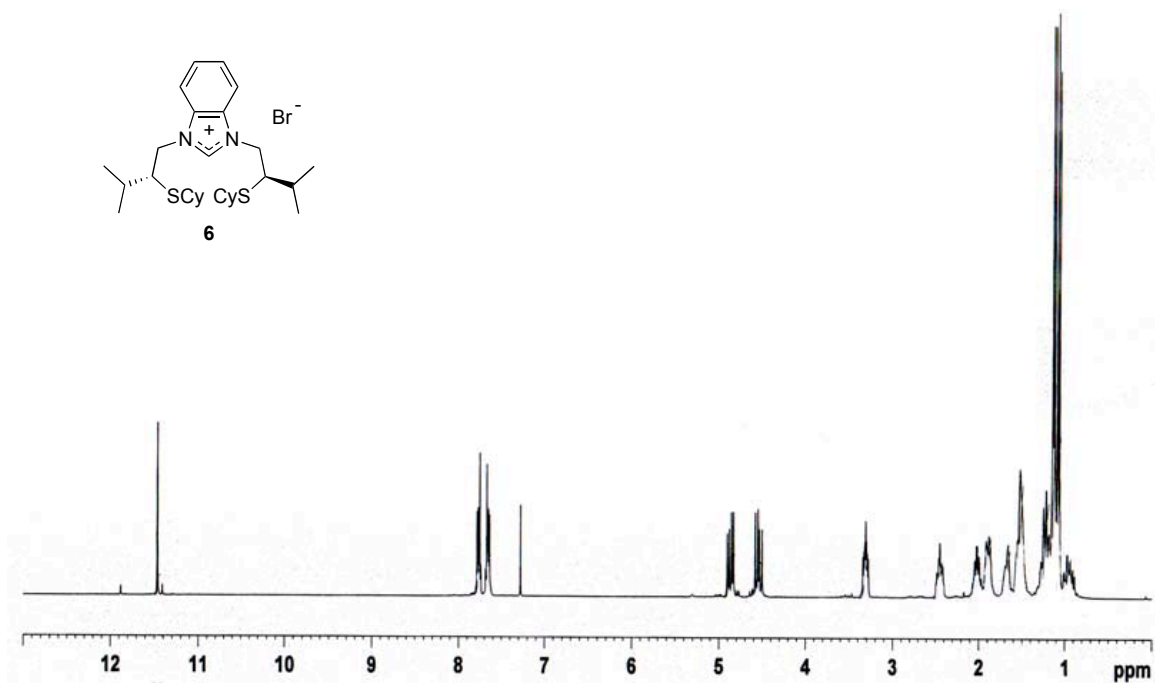

$^{13}\text{C}$  NMR ( $\text{CDCl}_3$ , 125 MHz)

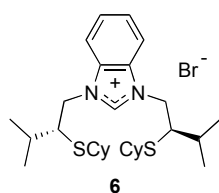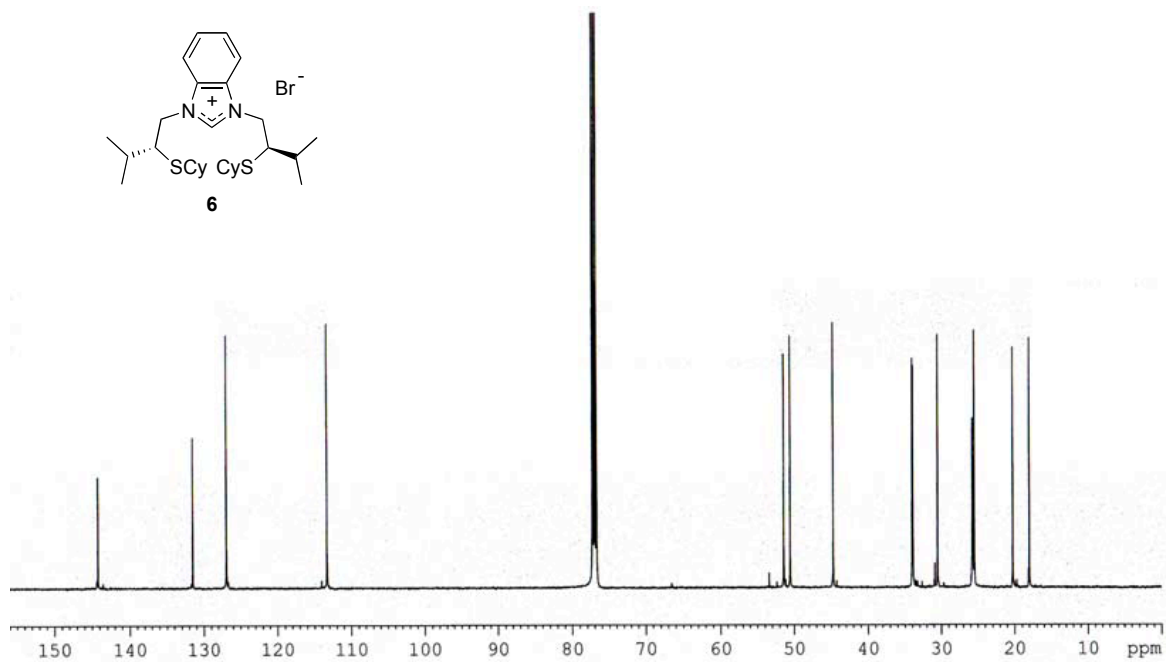

$^1\text{H}$  NMR ( $\text{CDCl}_3$ , 300 MHz)

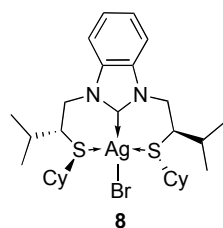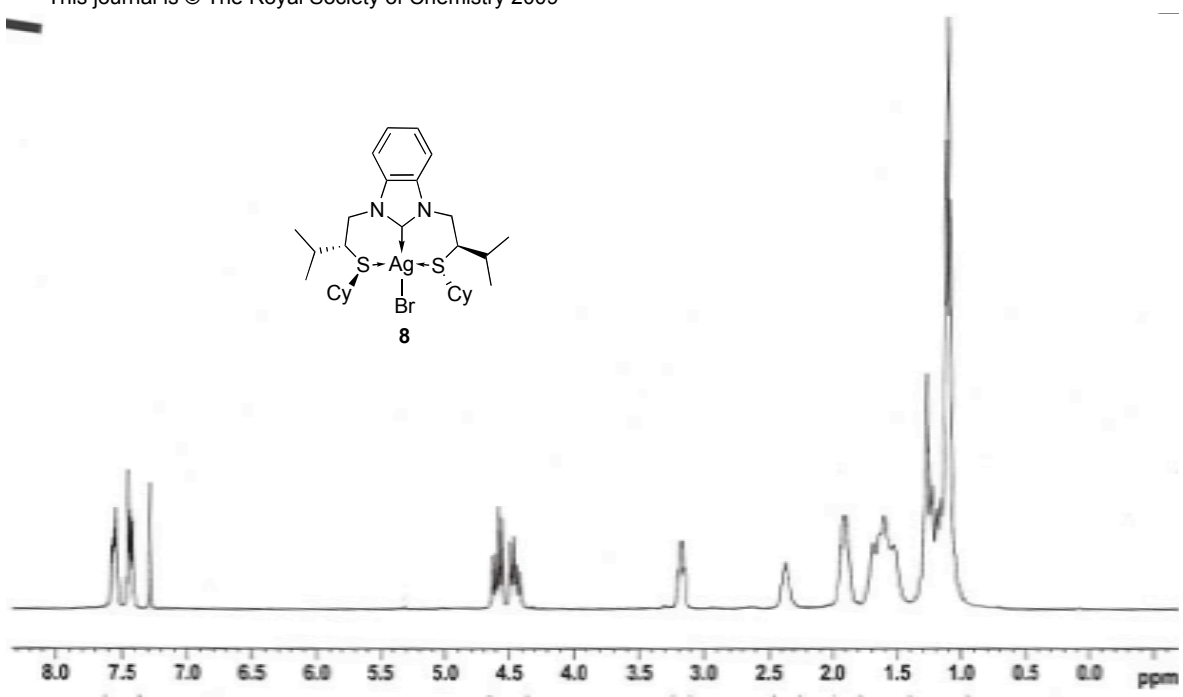

$^{13}\text{C}$  NMR (CDCl<sub>3</sub>, 75 MHz)

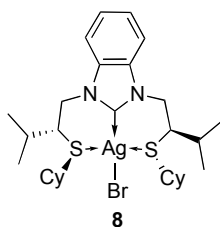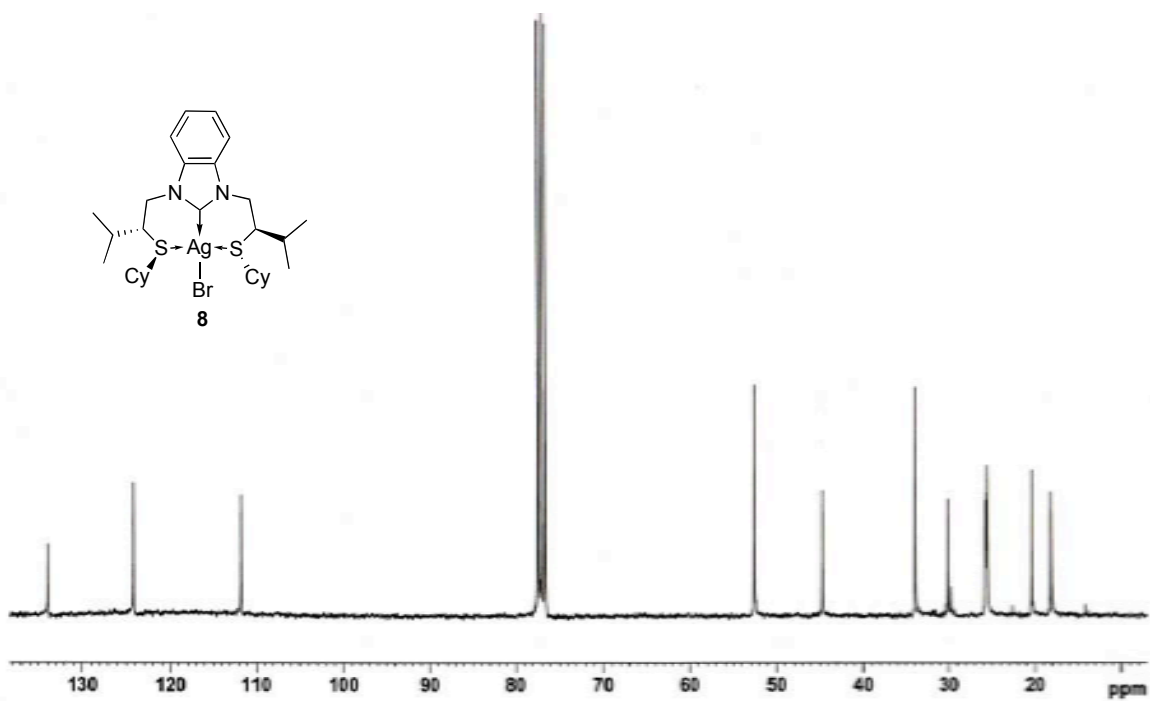

$^1\text{H}$  NMR (CDCl<sub>3</sub>, 400 MHz)

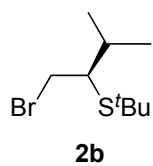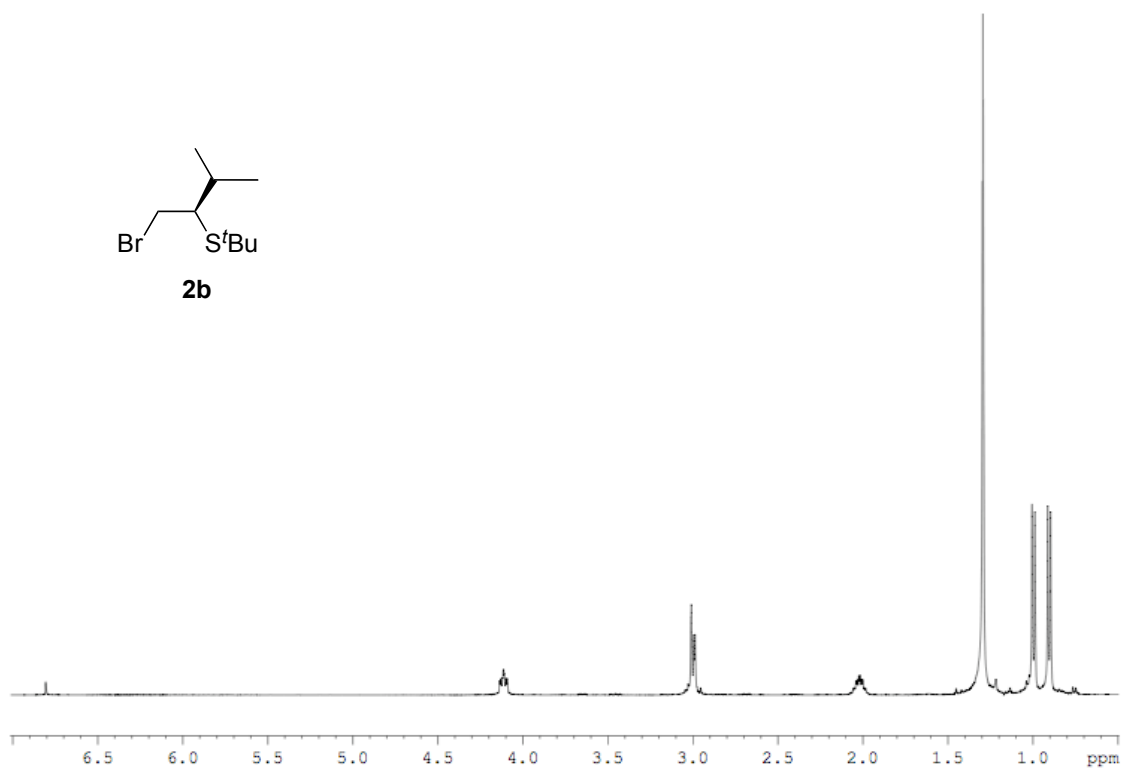

$^{13}\text{C}$  NMR ( $\text{CDCl}_3$ , 100 MHz)

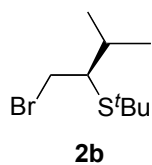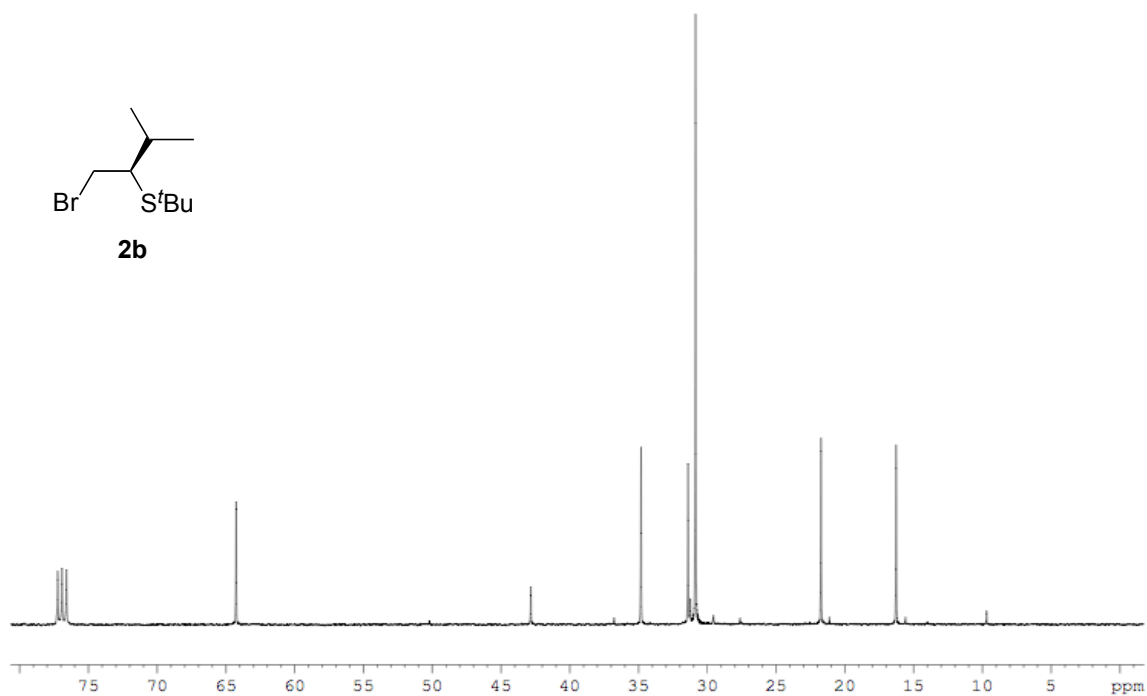

$^1\text{H}$  NMR ( $\text{CDCl}_3$ , 400 MHz)

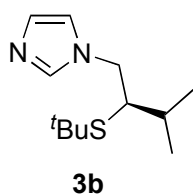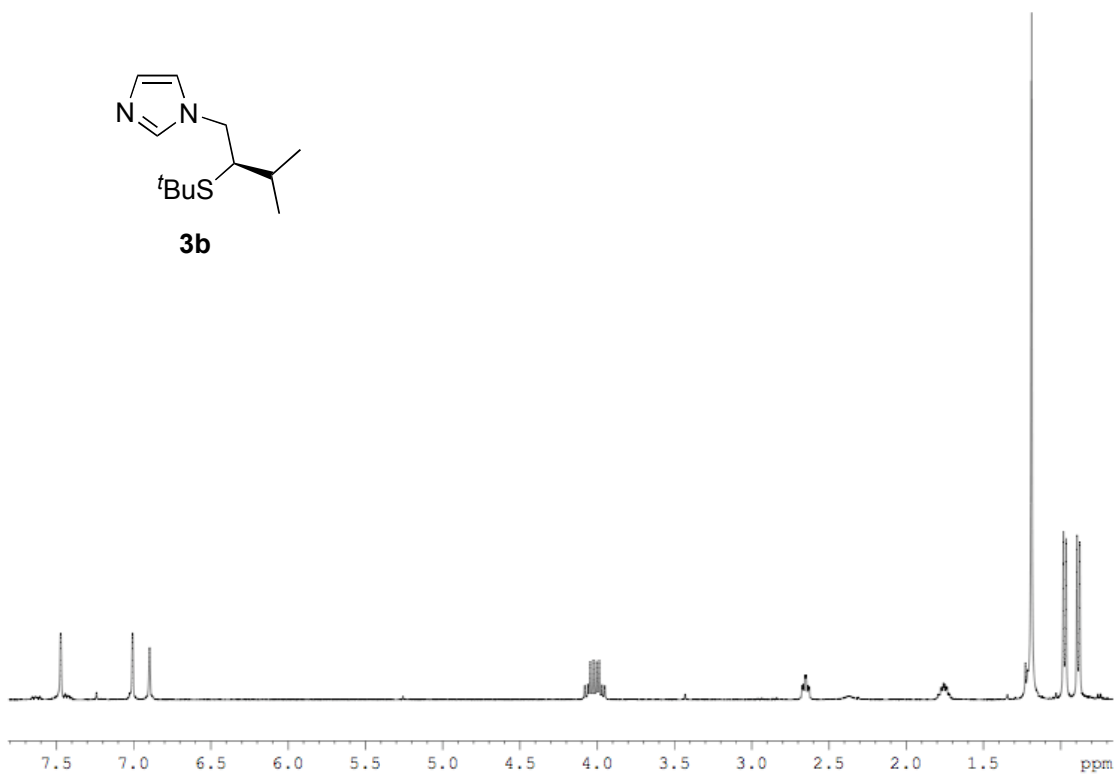

$^{13}\text{C}$  NMR (CDCl<sub>3</sub>, 100 MHz)

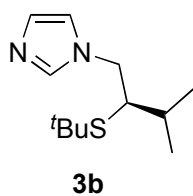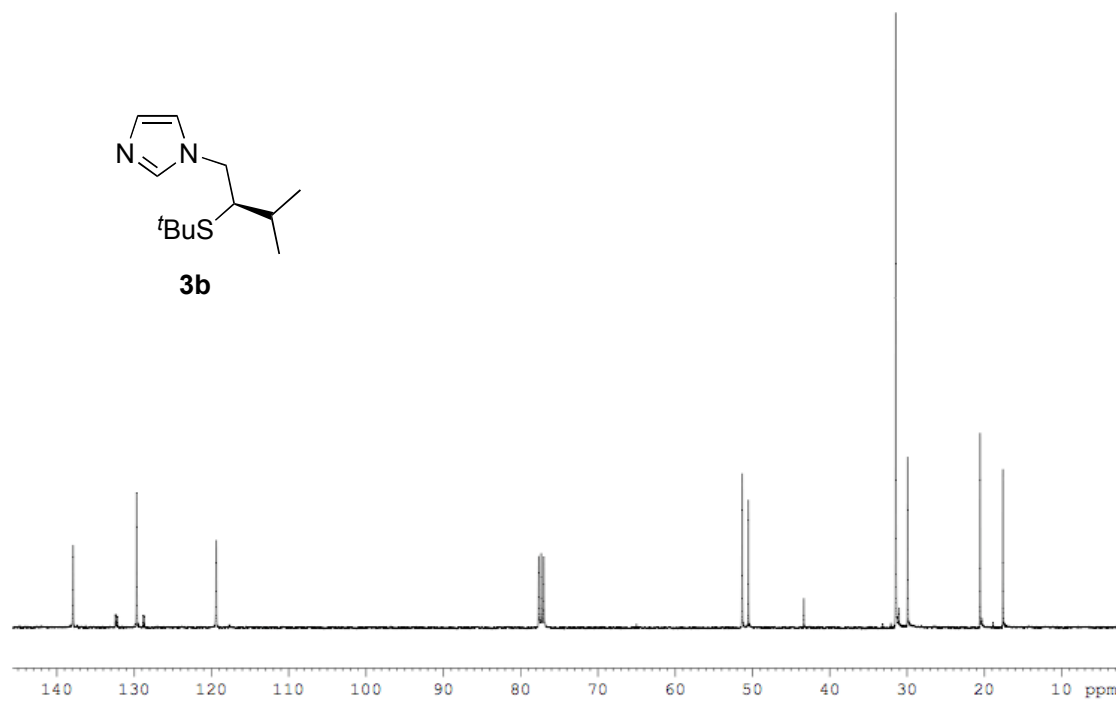

$^1\text{H}$  NMR (CDCl<sub>3</sub>, 500 MHz)

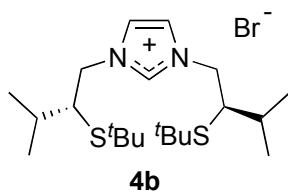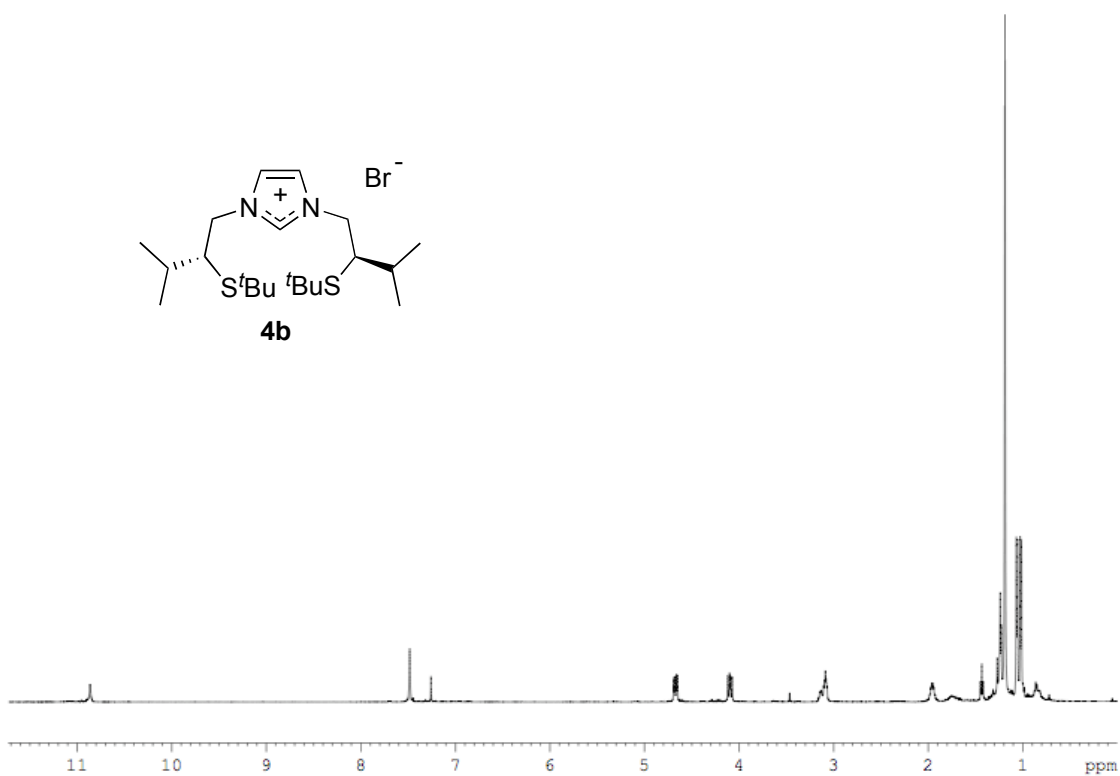

<sup>13</sup>C NMR (CDCl<sub>3</sub>, 125 MHz)

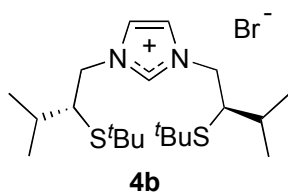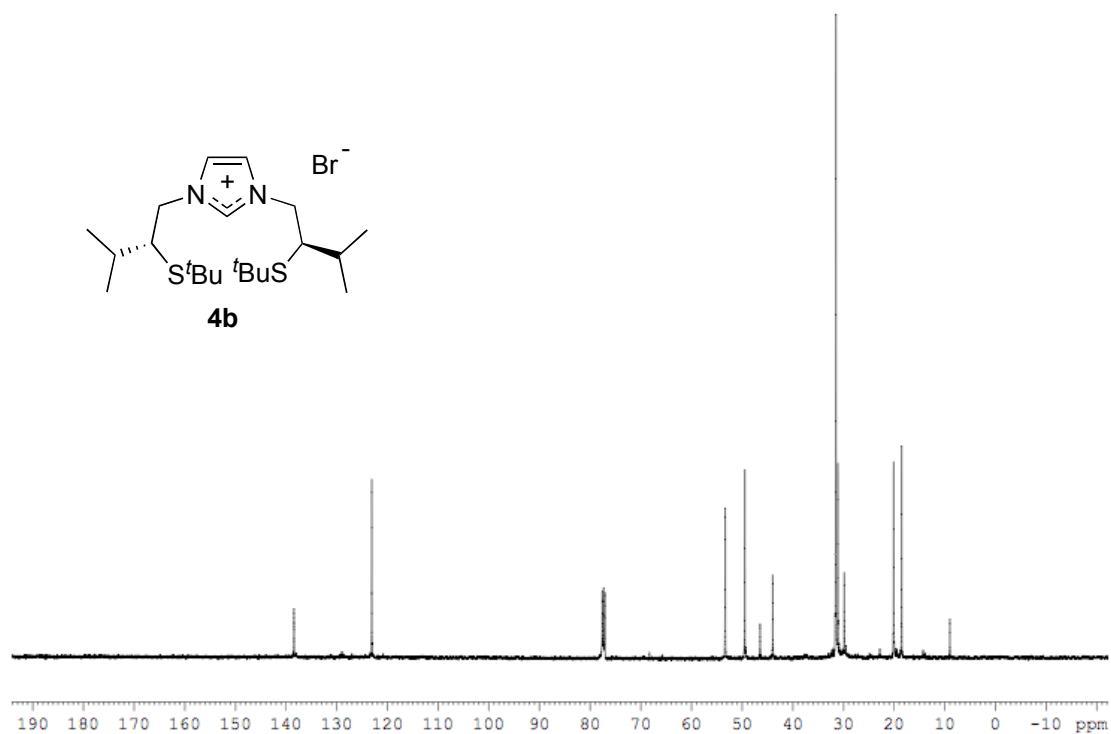

<sup>1</sup>H NMR (CDCl<sub>3</sub>, 500 MHz)

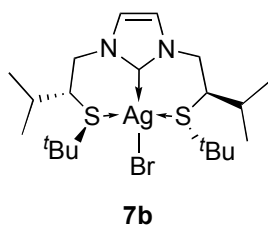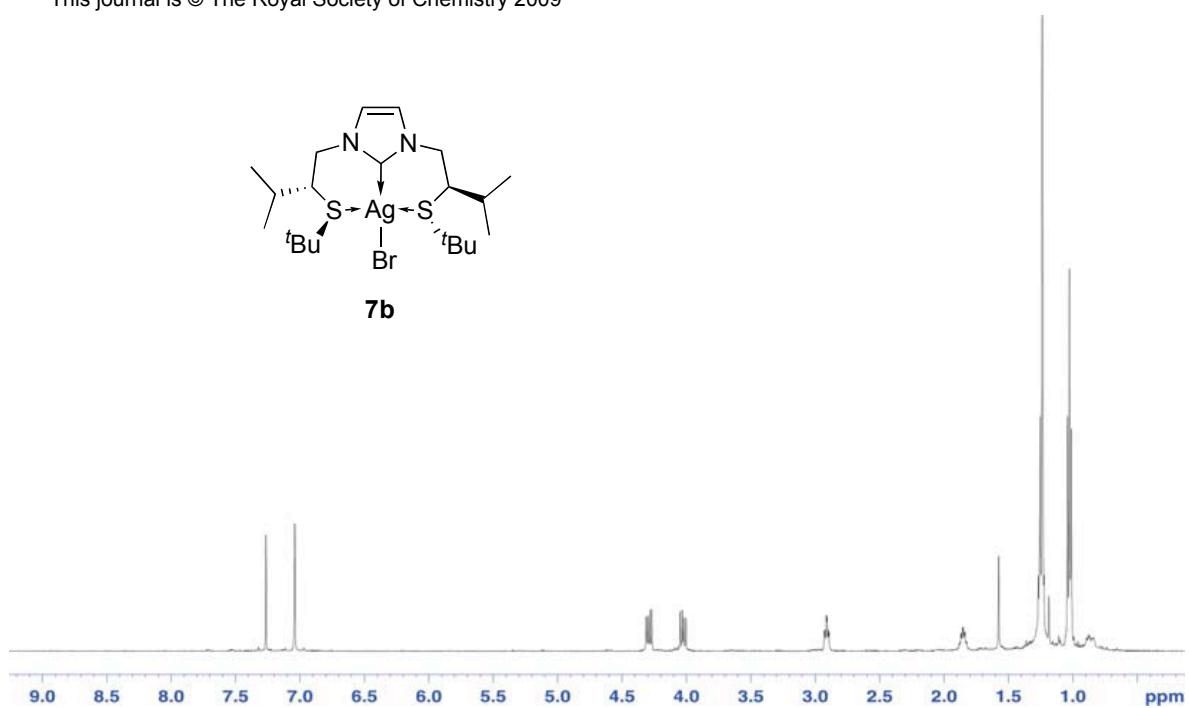

$^{13}\text{C}$  NMR ( $\text{CDCl}_3$ , 125 MHz)

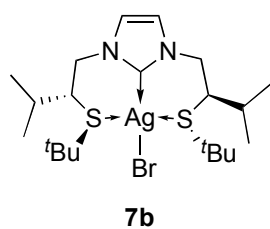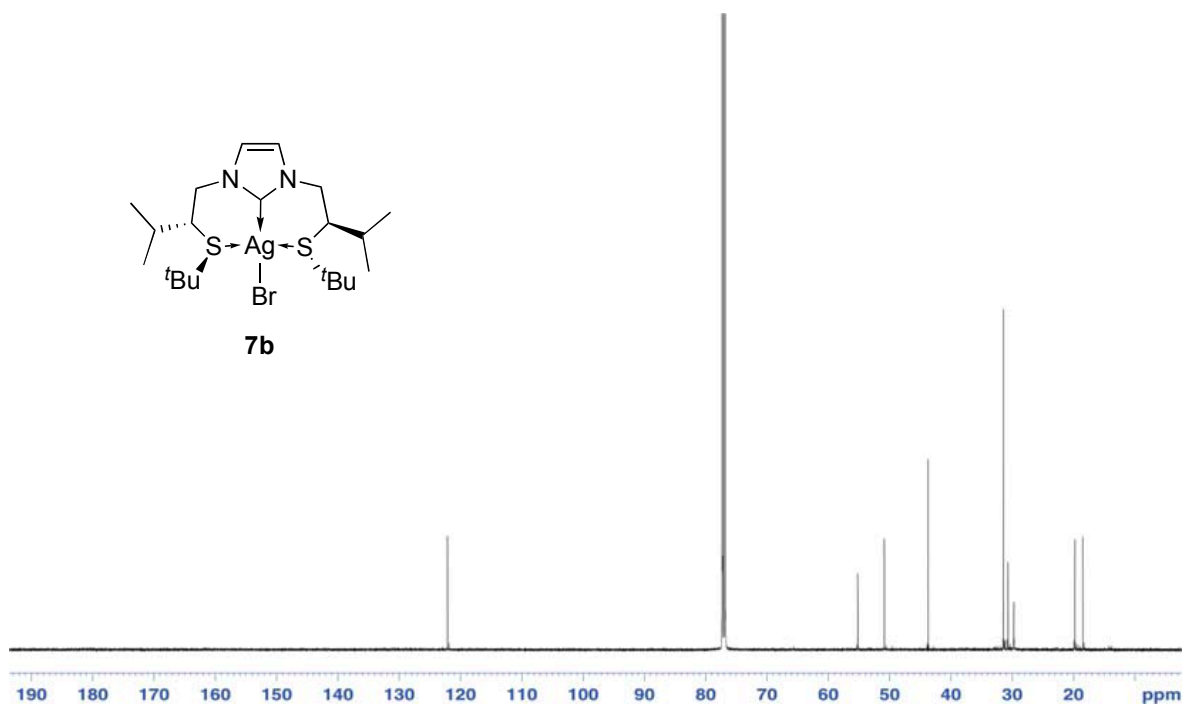

$^1\text{H}$  NMR ( $\text{CDCl}_3$ , 500 MHz)



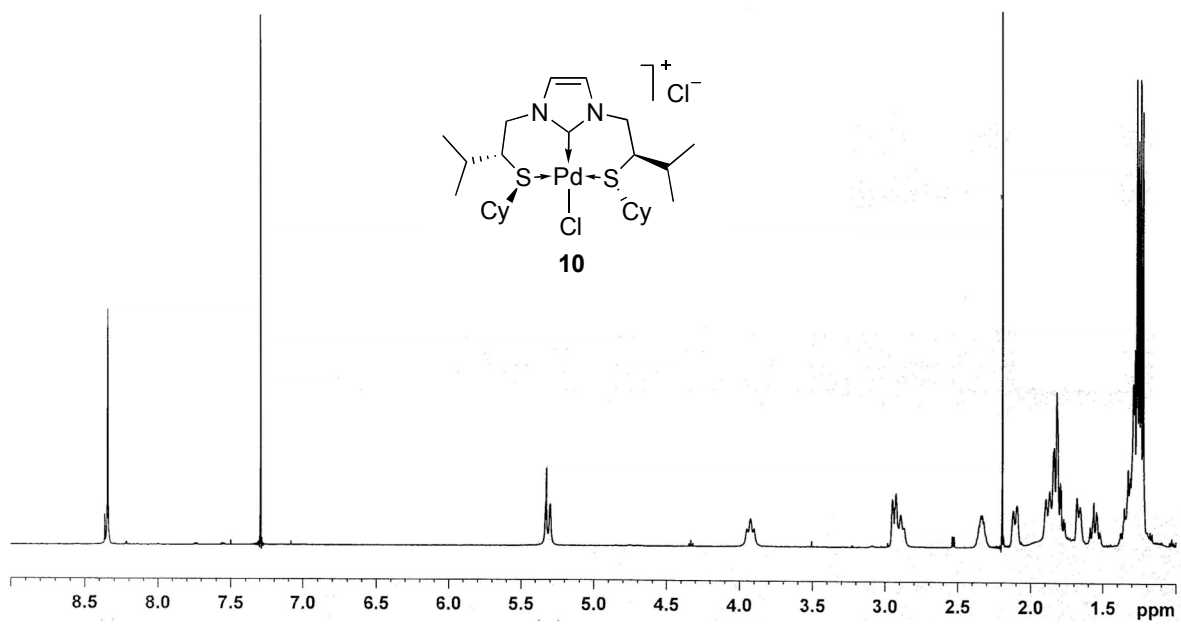

$^{13}\text{C}$  NMR ( $\text{CDCl}_3$ , 125 MHz)

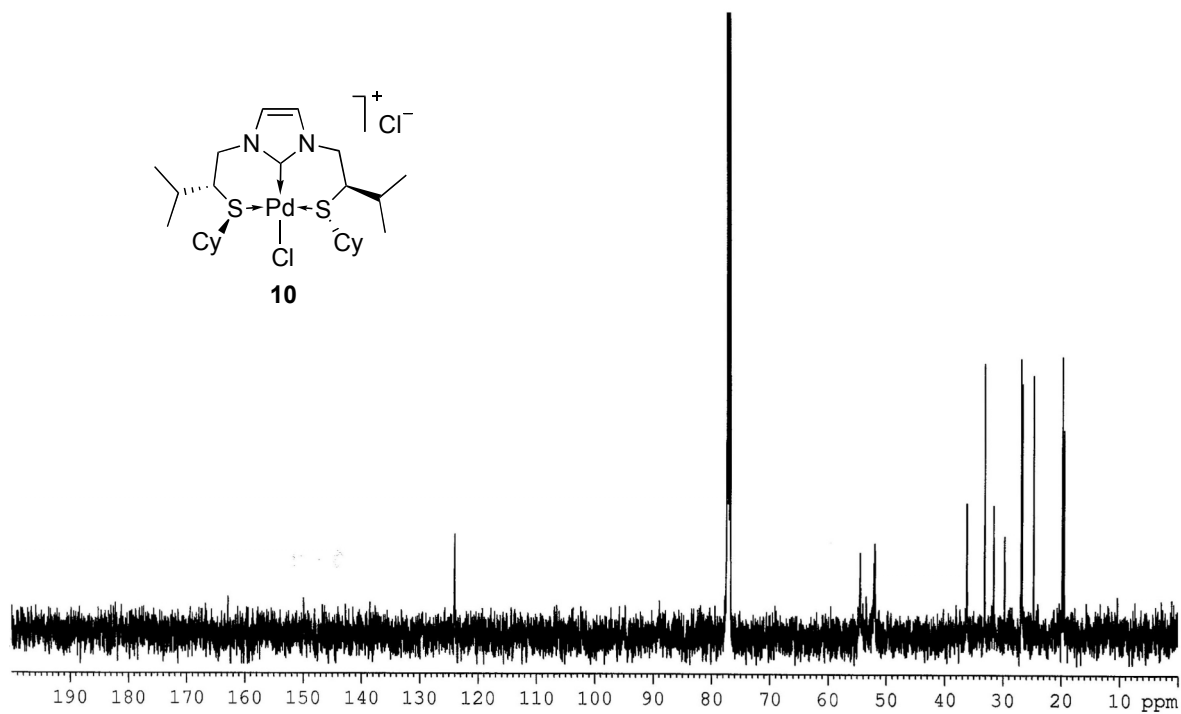

$^1\text{H}$  NMR ( $\text{CDCl}_3$ , 500 MHz)

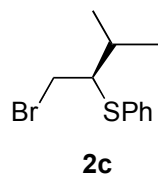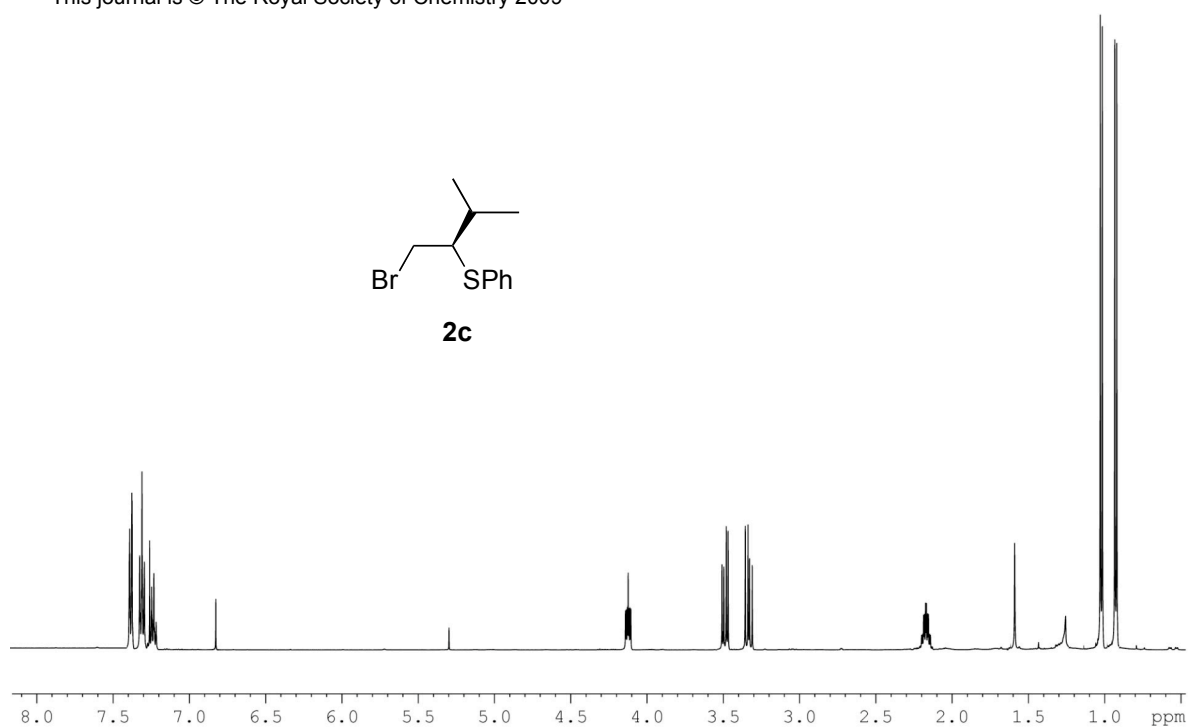

$^{13}\text{C}$  NMR ( $\text{CDCl}_3$ , 125 MHz)

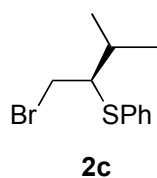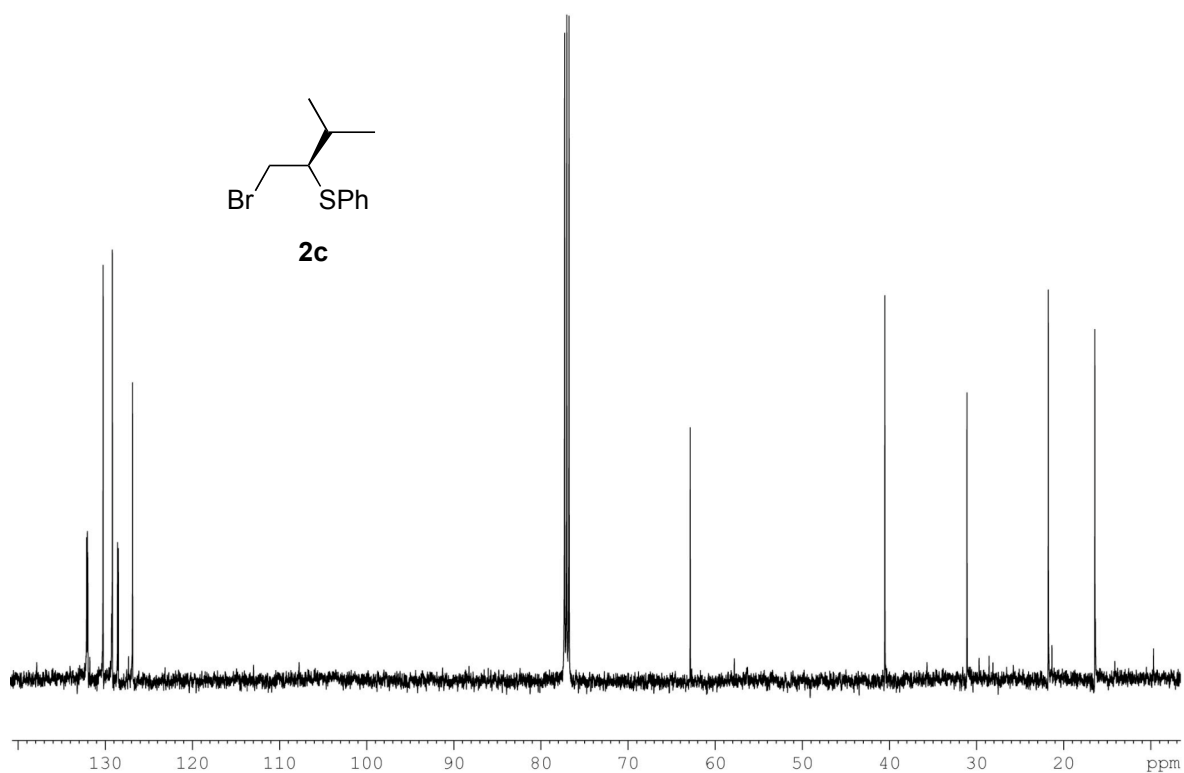

$^1\text{H}$  NMR ( $\text{CDCl}_3$ , 500 MHz)

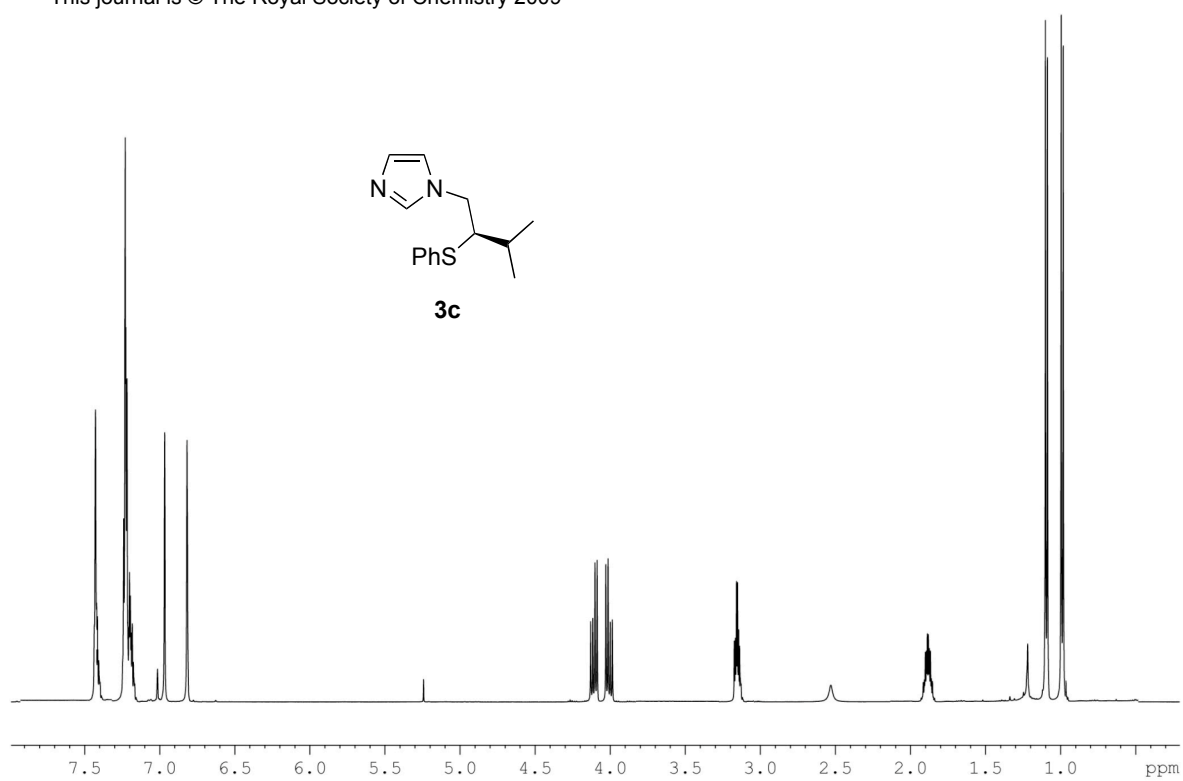

<sup>13</sup>C NMR (CDCl<sub>3</sub>, 125 MHz)

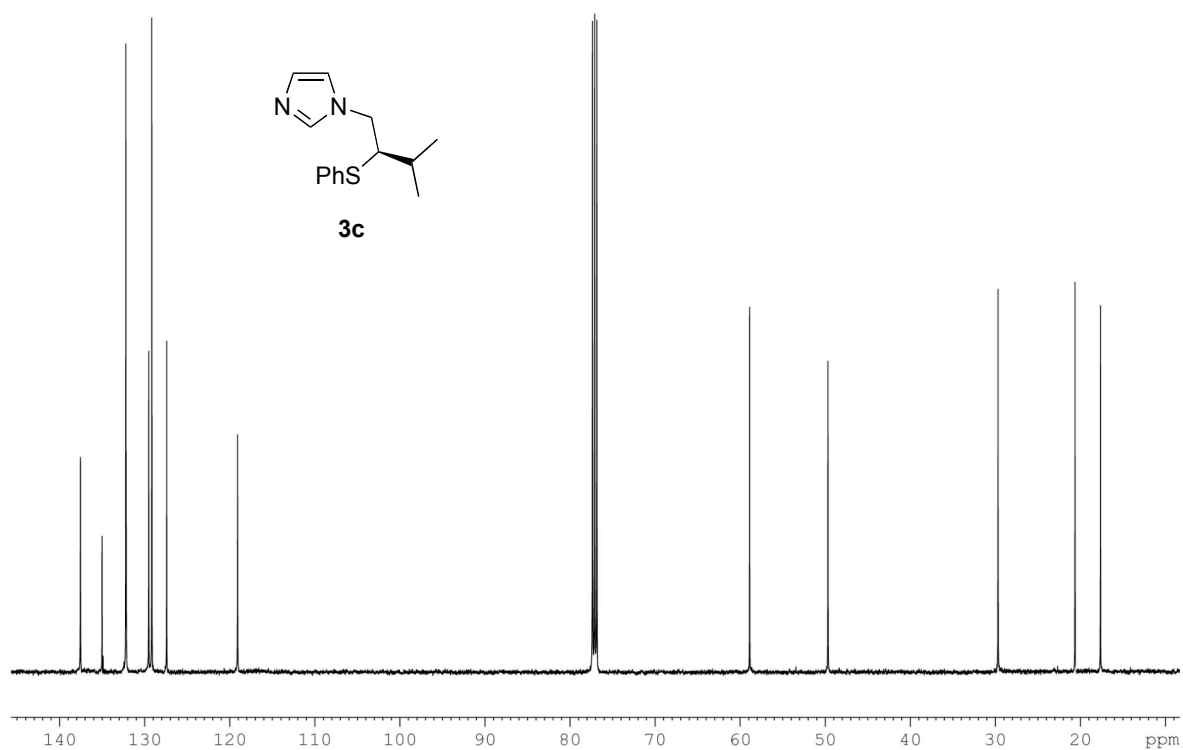

<sup>1</sup>H NMR (CDCl<sub>3</sub>, 500 MHz)

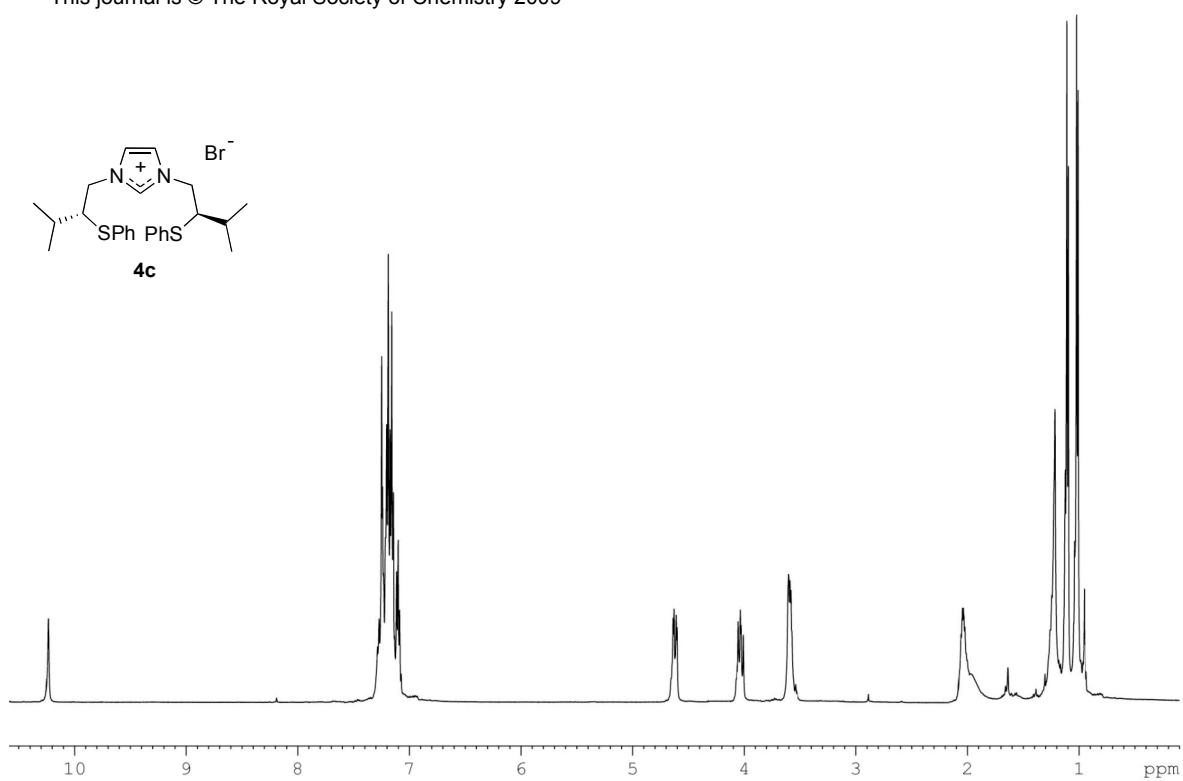

$^{13}\text{C}$  NMR (CDCl<sub>3</sub>, 125 MHz)

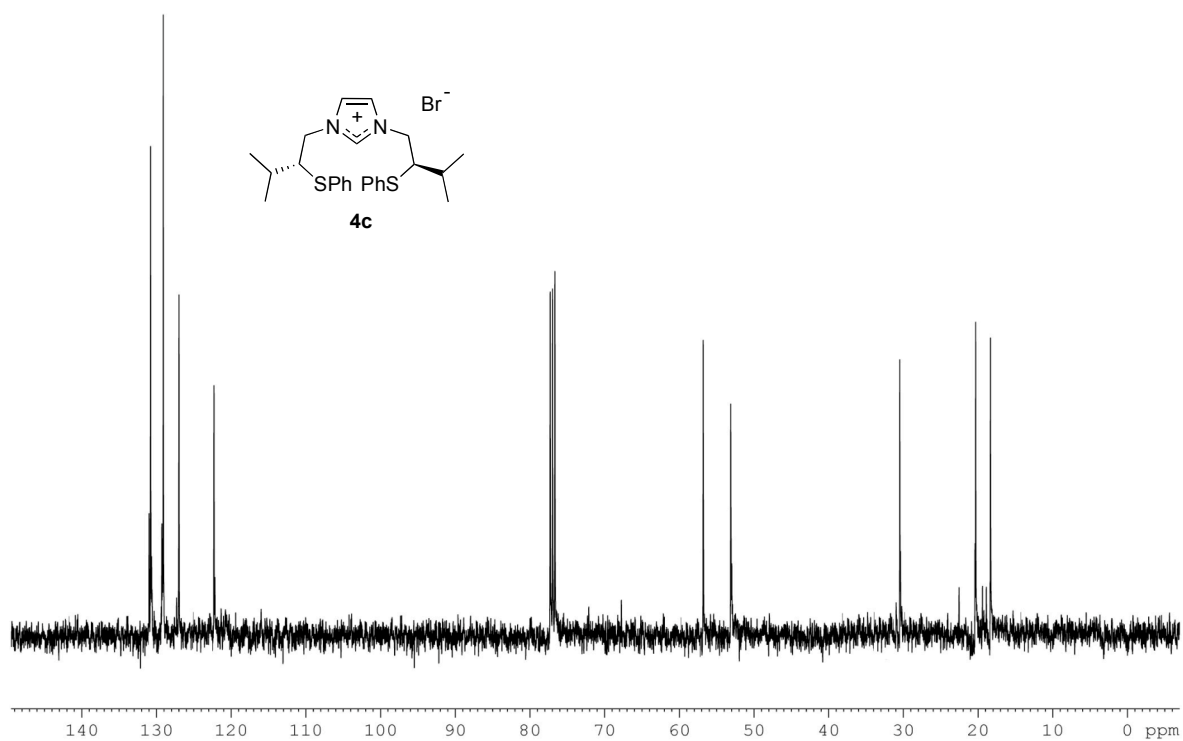

$^1\text{H}$  NMR (CDCl<sub>3</sub>, 500 MHz)

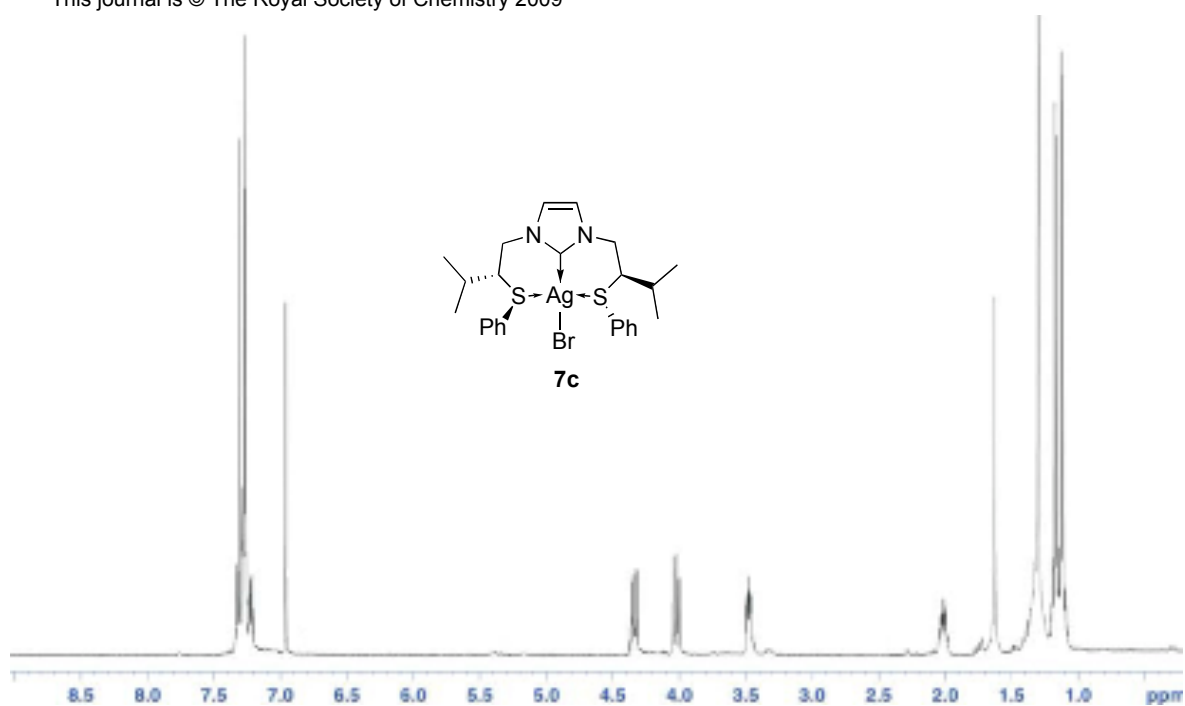

$^{13}\text{C}$  NMR ( $\text{CDCl}_3$ , 125 MHz)

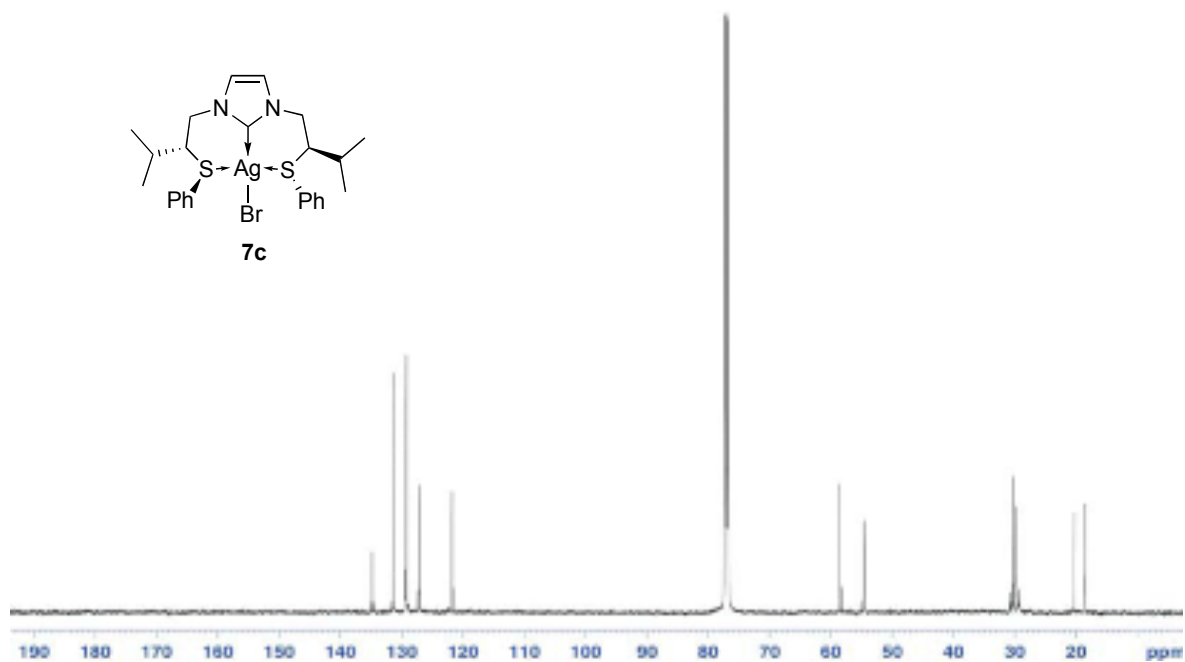

$^1\text{H}$  NMR ( $\text{CDCl}_3$ , 400 MHz)

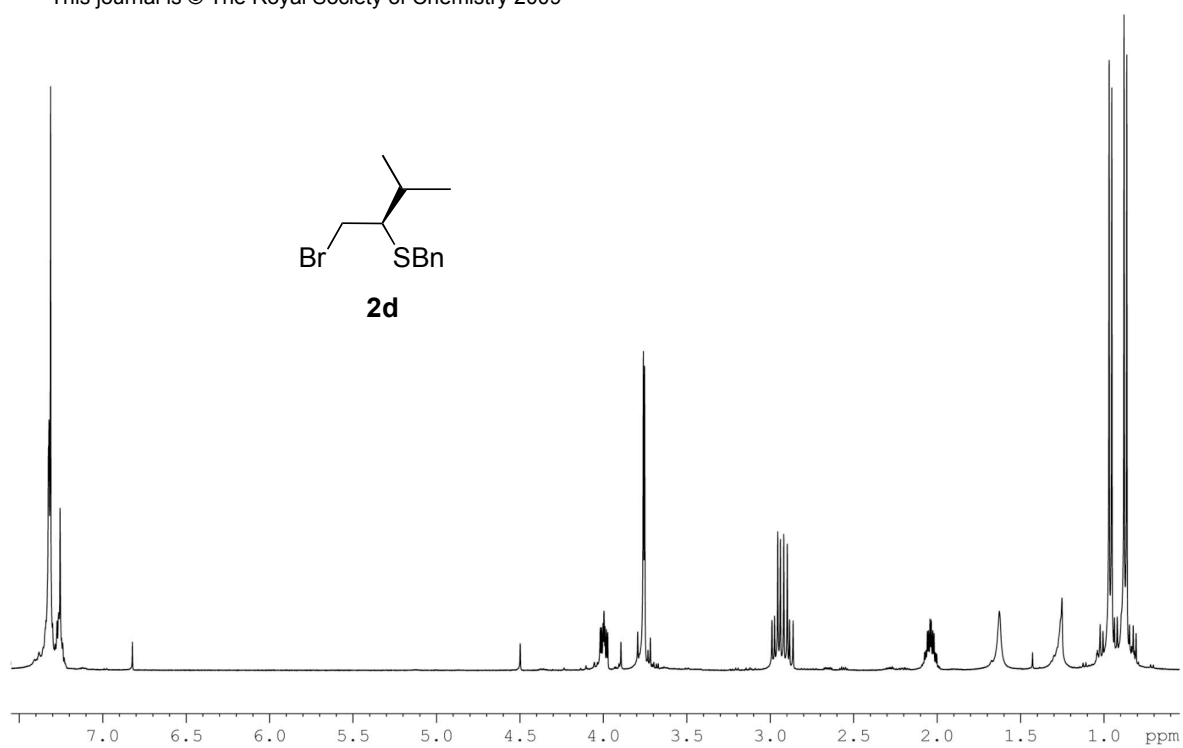

<sup>13</sup>C NMR (CDCl<sub>3</sub>, 100 MHz)

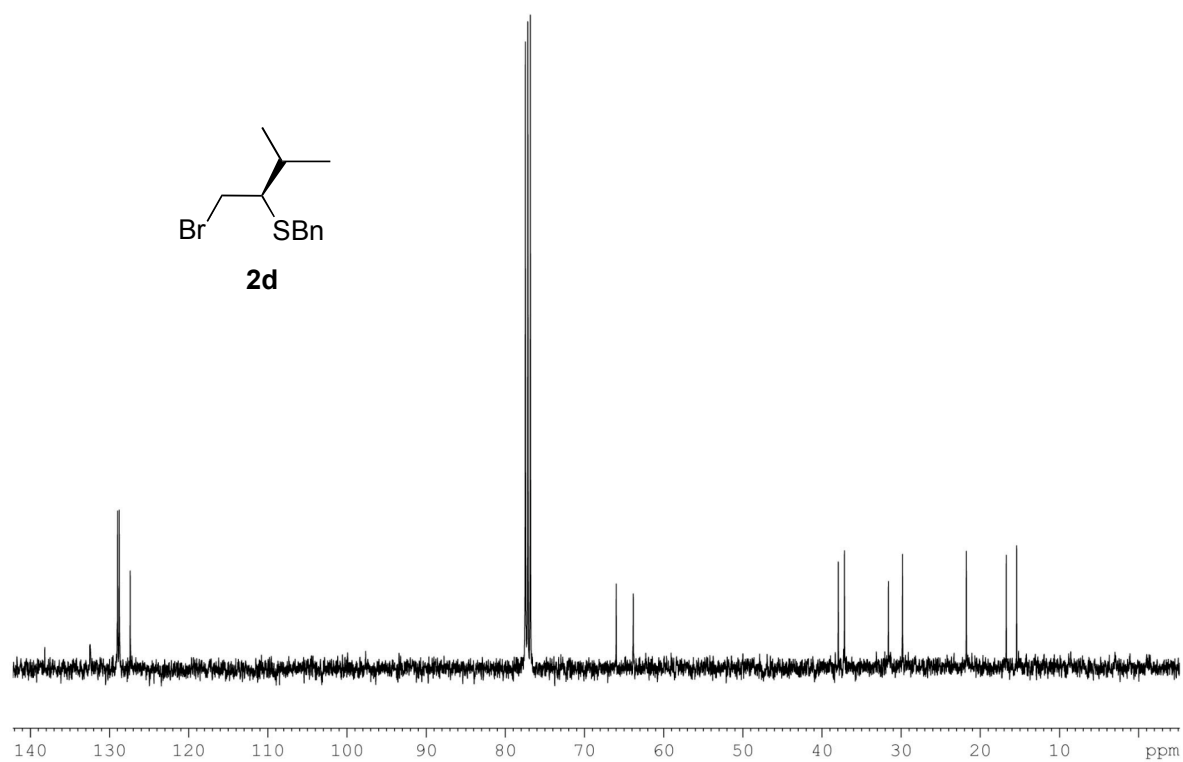

<sup>1</sup>H NMR (CDCl<sub>3</sub>, 400 MHz)

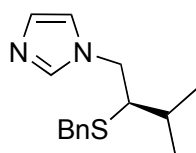

**3d**

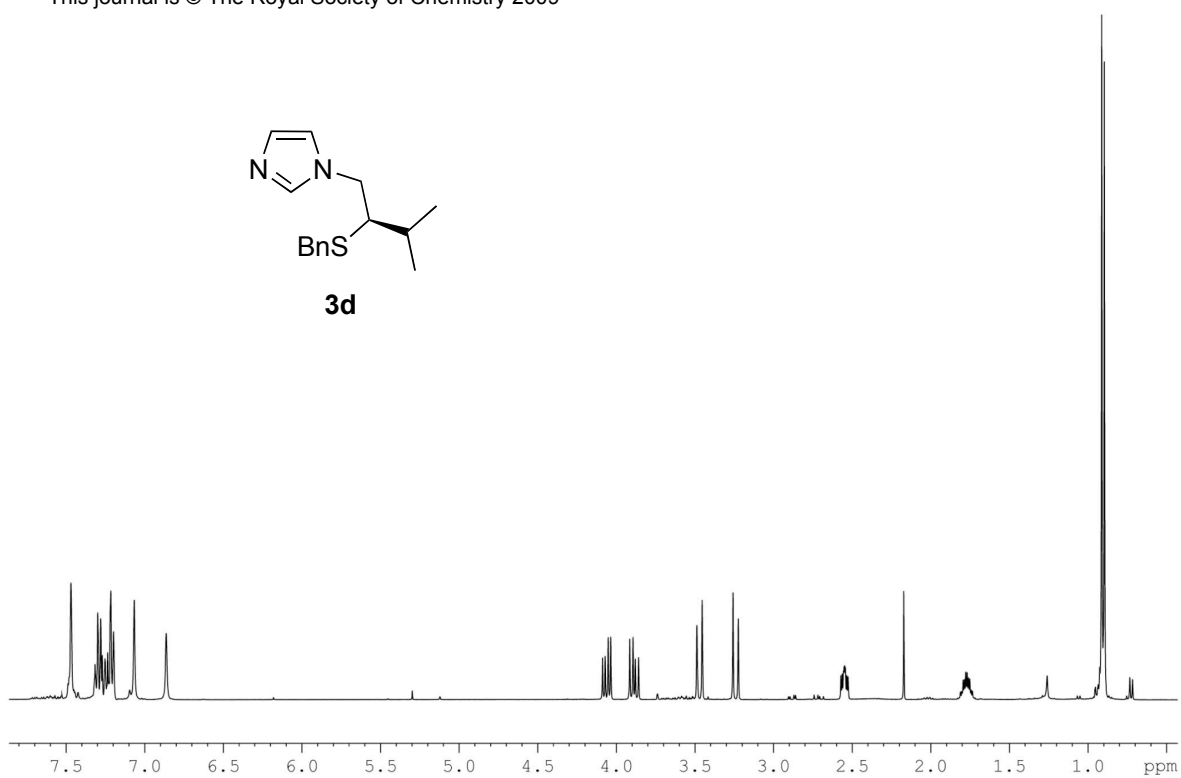

$^{13}\text{C}$  NMR (CDCl<sub>3</sub>, 100 MHz)

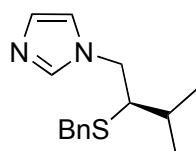

**3d**

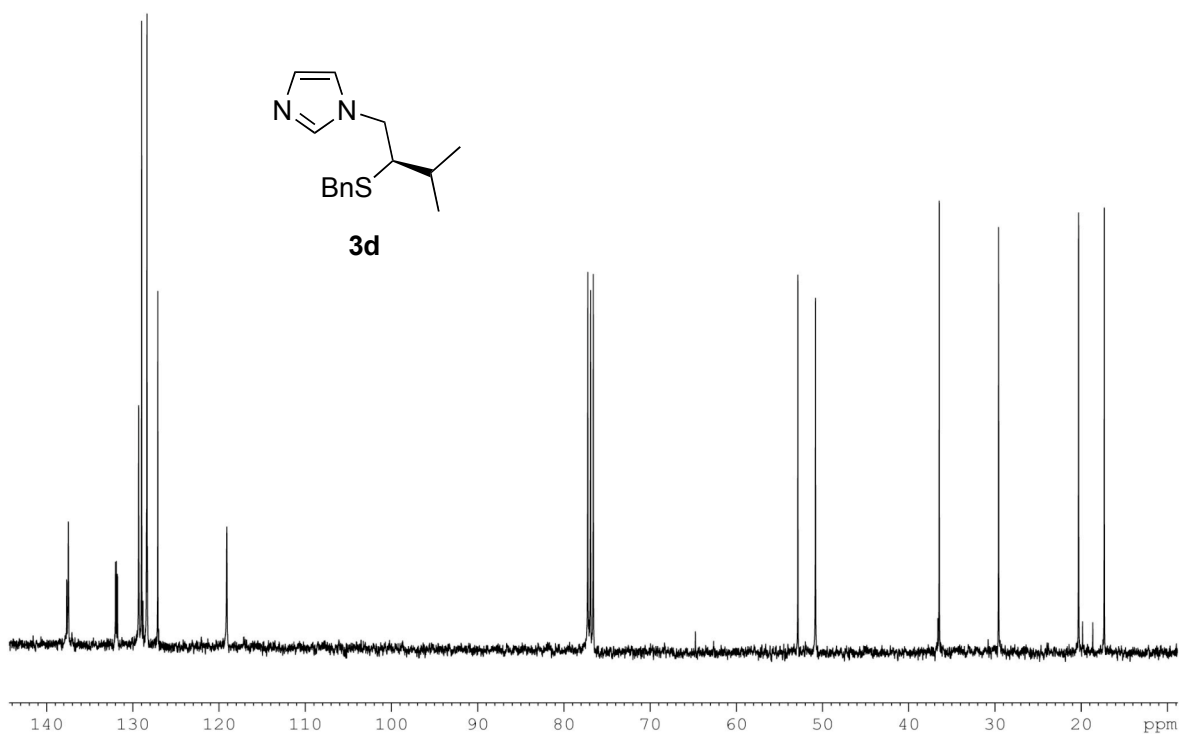

$^1\text{H}$  NMR (CDCl<sub>3</sub>, 500 MHz)

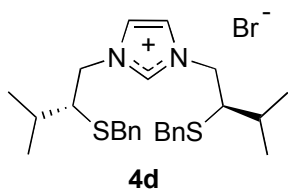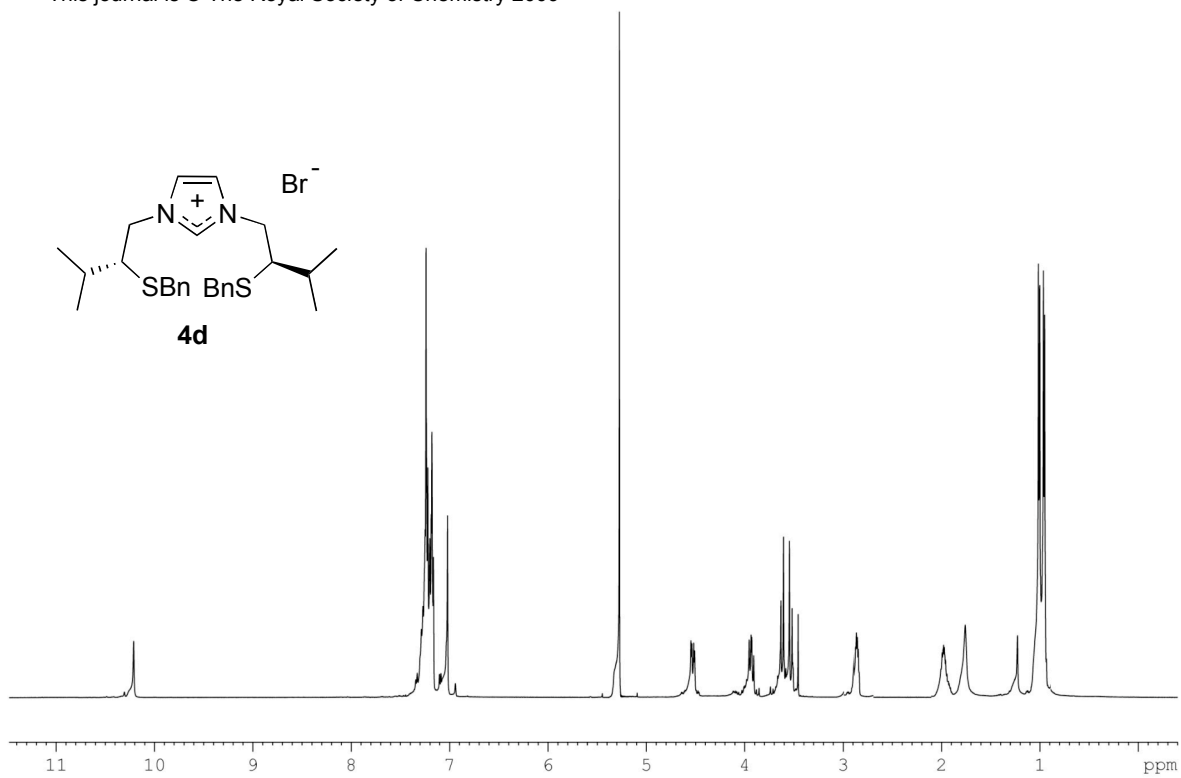

$^{13}\text{C}$  NMR ( $\text{CDCl}_3$ , 125 MHz)

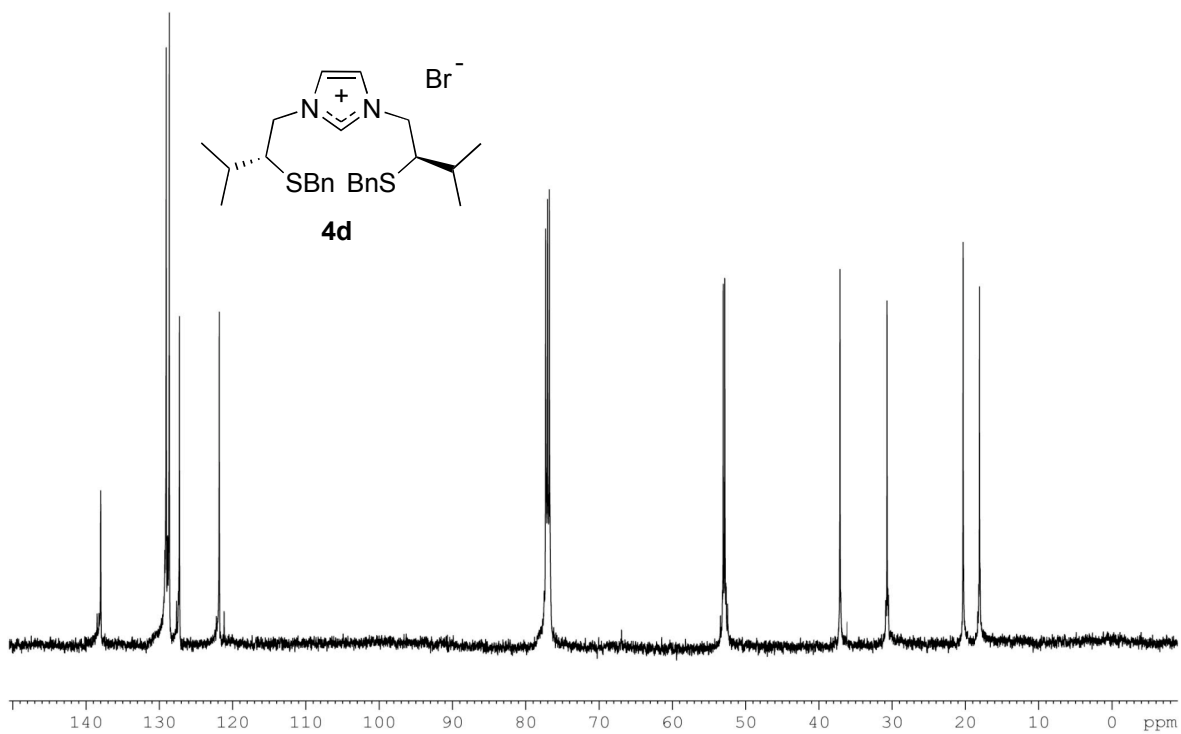

$^1\text{H}$  NMR ( $\text{CDCl}_3$ , 500 MHz)



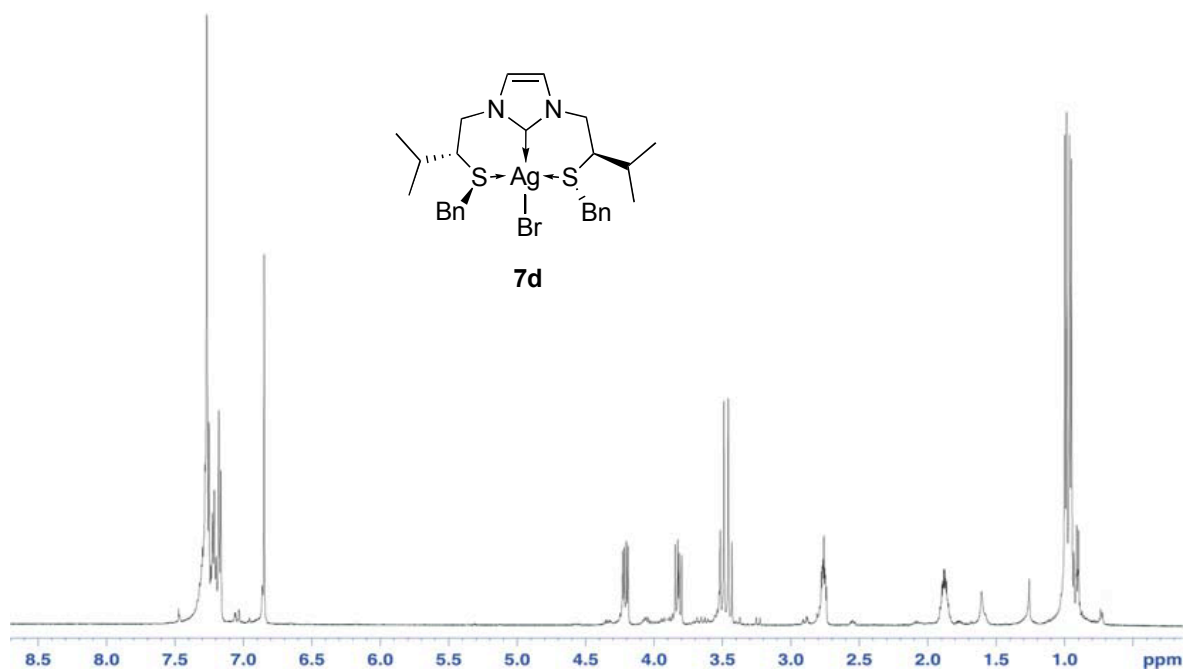

$^{13}\text{C}$  NMR ( $\text{CDCl}_3$ , 125 MHz)

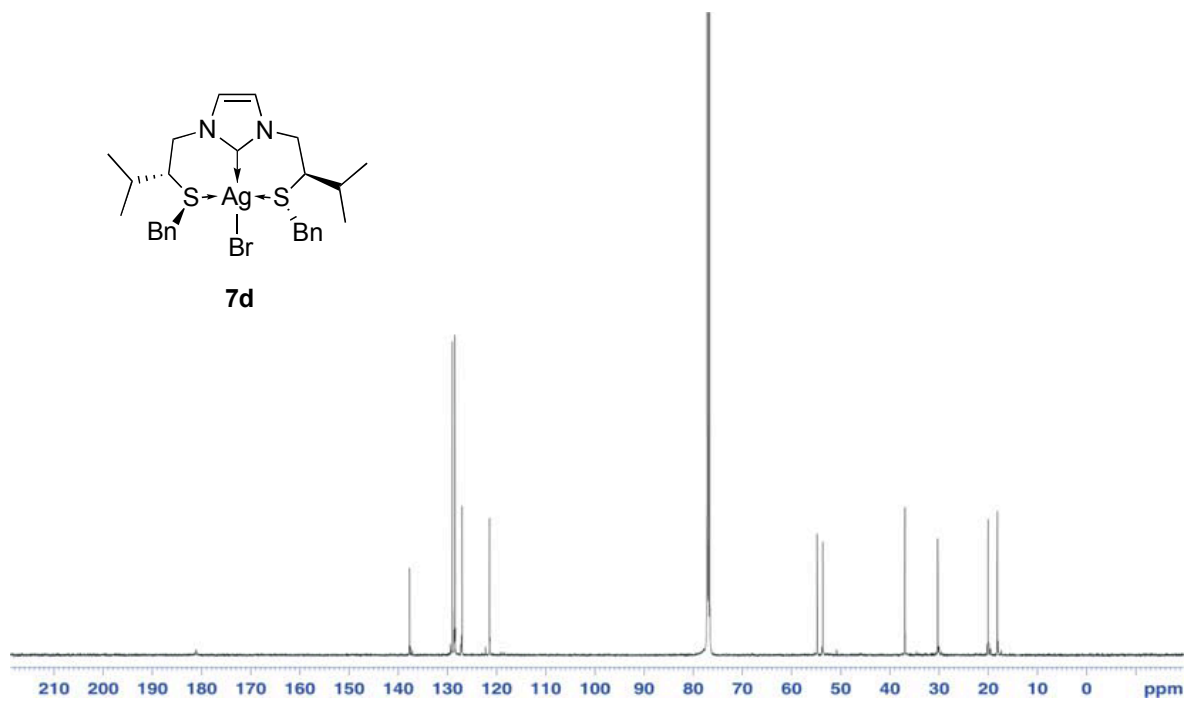

$^1\text{H}$  NMR ( $\text{CDCl}_3$ , 300 MHz)

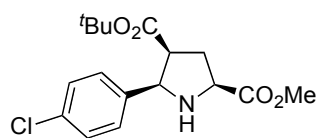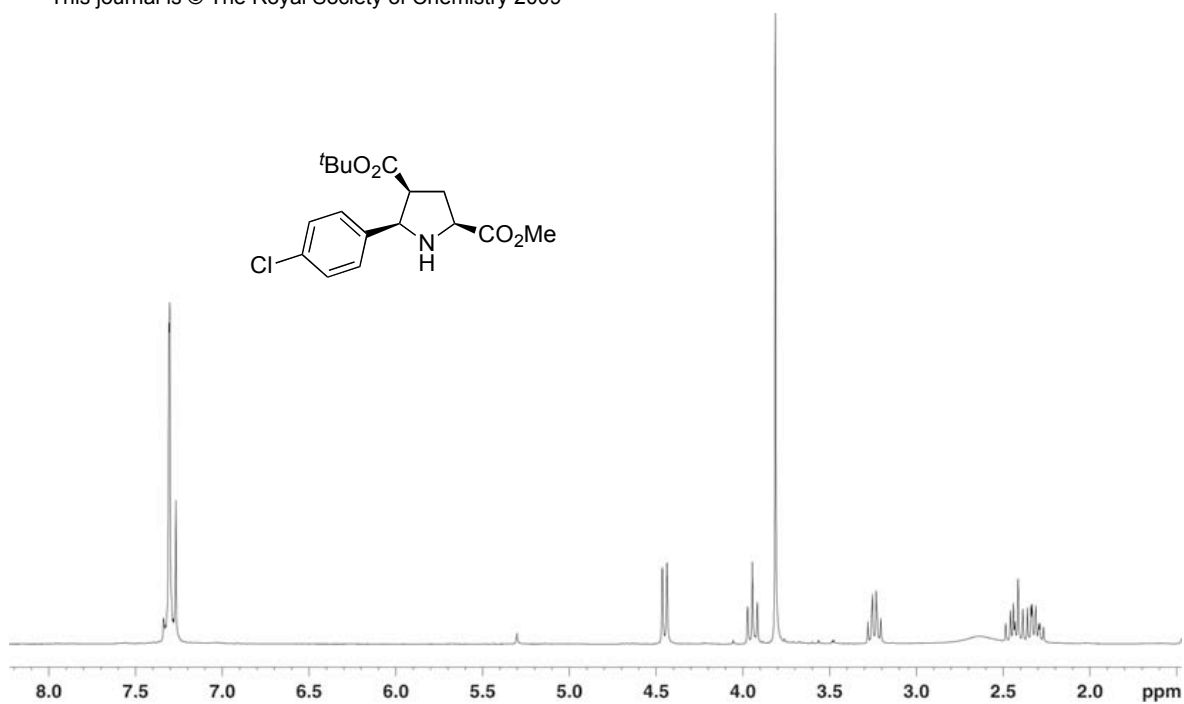

<sup>13</sup>C NMR (CDCl<sub>3</sub>, 75 MHz)

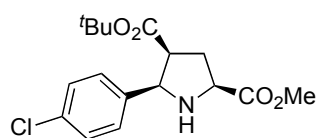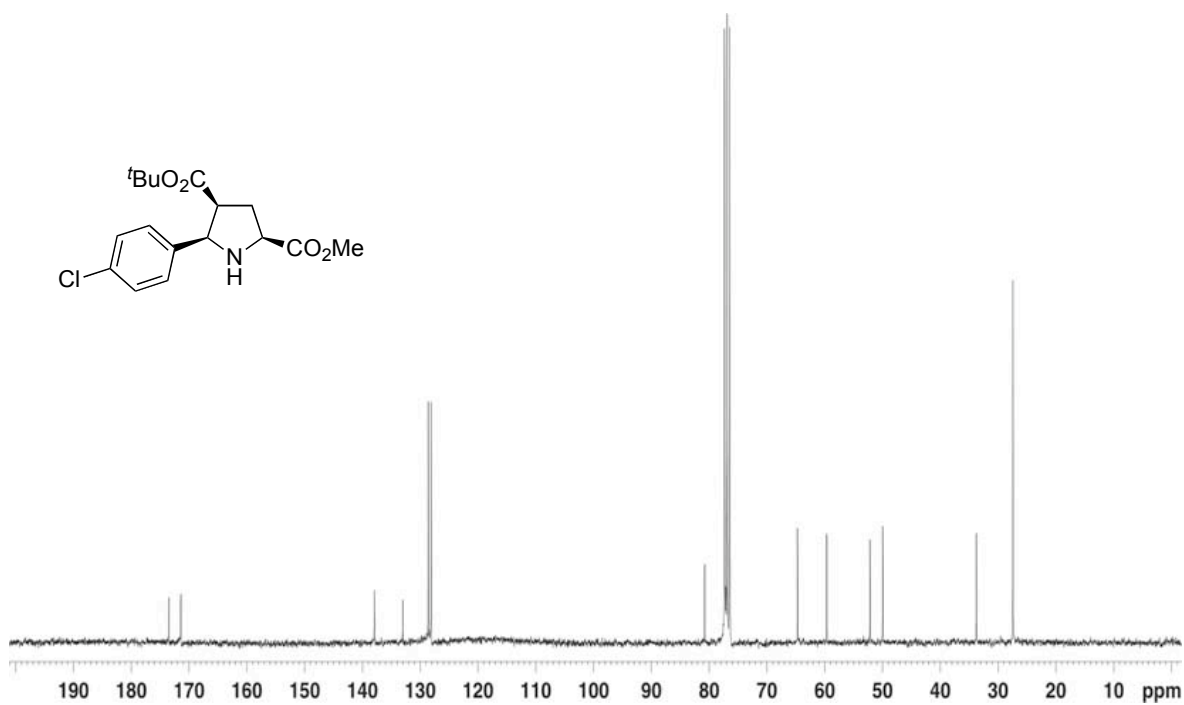

Supplement: b910846g.pdf [file b910846g.pdf]
